# Supplementary material for: Diffusion-based generation of gene regulatory networks from scRNA-seq data with DigNet
Source: HighWire-hosted journal article supplement (doi:10.1101/gr.279551.124), 2024-12-18
Supplement: Supplemental_Tables_.docx [file Supplemental_Tables_.docx]

# Supplemental Tables

**Supplementary Table S1.** Patient and cell subtype information from the E-MTAB-8107 dataset.

| **Patient ID** | **Renumber** | **T_cell** | **B_cell** | **Cancer cell** |
| --- | --- | --- | --- | --- |
| sc5rJUQ033 | S33 | 178 | 163 | 244 |
| sc5rJUQ039 | S39 | 314 | 168 | 78 |
| sc5rJUQ042 | S42 | 286 | 101 | 370 |
| sc5rJUQ053 | S53 | 587 | 235 | 316 |
| sc5rJUQ060 | S60 | 396 | 147 | 228 |

**Supplementary Table S2.** Top 20 key genes identified in breast cancer T cells using different algorithms.

|  | **DigNet** | **DUBStepR** | **Seurat** | **sPLS-DA** | **SVM-RFE** |
| --- | --- | --- | --- | --- | --- |
| 1 | *JUN* | *BRD1* | *METRNL* | *EXOSC6* | *SMAP2* |
| 2 | *MYC* | *CDC42* | *THBS1* | *ZRANB1* | *TM4SF1* |
| 3 | *SP1* | *ATP1B3* | *NFIL3* | *PPP2CA* | *RAP2B* |
| 4 | *FOS* | *HSP90AA1* | *ZFPM1* | *GSK3A* | *SRP19* |
| 5 | *JUNB* | *JOSD1* | *EMP1* | *PPP2R2D* | *EEF1A1* |
| 6 | *RELA* | *CREM* | *MXRA7* | *CDV3* | *PSMA2* |
| 7 | *STAT1* | *CDV3* | *NDUFB8* | *BRAF* | *CD81* |
| 8 | *MALAT1* | *JUND* | *ELL2* | *JUND* | *MALAT1* |
| 9 | *JUND* | *GSPT1* | *TM4SF1* | *RAB21* | *NDUFC2* |
| 10 | *IRF1* | *CSNK1A1* | *SRP19* | *CTNNB1* | *NDUFB8* |
| 11 | *AGPAT5* | *PPP2R5C* | *CTNNAL1* | *NUDT4* | *MXI1* |
| 12 | *TRIM13* | *PAK2* | *RHOQ* | *RIT1* | *ARHGAP5* |
| 13 | *TTC33* | *PDCL3* | *PMEPA1* | *CD81* | *PPP2R5C* |
| 14 | *CDKN1A* | *SMAP2* | *ENDOG* | *ATP6V1D* | *GSPT1* |
| 15 | *LMNA* | *DNAJA1* | *VKORC1* | *TOR1AIP2* | *BRD7* |
| 16 | *MALT1* | *CD81* | *ZNF787* | *MAPK8* | *PLCG2* |
| 17 | *HSPA1A* | *GRB2* | *ZNRF2* | *SRP19* | *METRNL* |
| 18 | *ZC3H12A* | *FYN* | *CFD* | *DNAJC21* | *CFD* |
| 19 | *FABP5* | *HSPD1* | *MRPL12* | *UBE2M* | *KLF2* |
| 20 | *IGFBP4* | *IRF7* | *HOMER1* | *MXD4* | *JUND* |

**Supplementary Table S3.** Gene regulatory networks in breast cancer T cells.

| **Source** | **Target** | **Wei**  **ght** | **Source** | **Target** | **Wei**  **ght** | **Source** | **Target** | **Wei**  **ght** | **Source** | **Target** | **Wei**  **ght** |
| --- | --- | --- | --- | --- | --- | --- | --- | --- | --- | --- | --- |
| *PIK3CD* | *AKT3* | 1 | *ARAF* | *GSK3B* | 1 | *DVL3* | *APC* | 2 | *SP1* | *KRAS* | 1 |
| *PIK3CD* | *PIK3CB* | 2 | *ARAF* | *PIK3CB* | 2 | *DVL3* | *BAK1* | 1 | *SP1* | *RB1* | 1 |
| *PIK3CD* | *PIK3R1* | 1 | *ARAF* | *DVL3* | 2 | *DVL3* | *BRAF* | 1 | *SP1* | *AKT1* | 2 |
| *PIK3CD* | *APC* | 1 | *ARAF* | *PIK3R1* | 1 | *DVL3* | *GADD45G* | 1 | *SP1* | *TP53* | 2 |
| *PIK3CD* | *CSNK1A1* | 1 | *ARAF* | *APC* | 3 | *DVL3* | *NOTCH1* | 1 | *SP1* | *MAP2K2* | 1 |
| *PIK3CD* | *CDK6* | 4 | *ARAF* | *CDK6* | 4 | *DVL3* | *HRAS* | 4 | *SP1* | *AKT2* | 1 |
| *PIK3CD* | *BRAF* | 5 | *ARAF* | *BRAF* | 2 | *DVL3* | *RPS6KB2* | 1 | *CDK4* | *MAP2K1* | 1 |
| *PIK3CD* | *NOTCH1* | 2 | *ARAF* | *KRAS* | 4 | *DVL3* | *RB1* | 1 | *RB1* | *SOS1* | 1 |
| *PIK3CD* | *RPS6KB2* | 4 | *ARAF* | *RB1* | 1 | *DVL3* | *AKT1* | 3 | *RB1* | *GSK3B* | 1 |
| *PIK3CD* | *PTEN* | 1 | *ARAF* | *AKT1* | 2 | *DVL3* | *MAP2K1* | 1 | *RB1* | *CSNK1A1* | 1 |
| *PIK3CD* | *RB1* | 1 | *ARAF* | *MAPK3* | 1 | *DVL3* | *MAPK3* | 4 | *RB1* | *CDK6* | 4 |
| *PIK3CD* | *AKT1* | 1 | *ARAF* | *DVL2* | 1 | *DVL3* | *DVL2* | 6 | *RB1* | *ARAF* | 1 |
| *PIK3CD* | *GRB2* | 1 | *ARAF* | *RPS6KB1* | 1 | *DVL3* | *RPS6KB1* | 1 | *RB1* | *NOTCH1* | 1 |
| *MTOR* | *SOS1* | 1 | *ARAF* | *BAX* | 1 | *DVL3* | *GRB2* | 1 | *RB1* | *AKT1* | 1 |
| *MTOR* | *APC* | 1 | *MYC* | *PIK3CD* | 8 | *DVL3* | *MAPK1* | 1 | *RB1* | *MAP2K1* | 1 |
| *MTOR* | *HRAS* | 1 | *MYC* | *MTOR* | 8 | *LEF1* | *PIK3CD* | 1 | *RB1* | *DVL2* | 1 |
| *MTOR* | *KRAS* | 1 | *MYC* | *GADD45A* | 22 | *LEF1* | *MTOR* | 1 | *RB1* | *MAP2K2* | 1 |
| *JUN* | *GADD45A* | 1 | *MYC* | *NRAS* | 3 | *LEF1* | *NRAS* | 1 | *FOS* | *GSK3B* | 1 |
| *JUN* | *NRAS* | 3 | *MYC* | *NOTCH2* | 8 | *LEF1* | *NOTCH2* | 1 | *FOS* | *PIK3CB* | 1 |
| *JUN* | *SHC1* | 1 | *MYC* | *SHC1* | 14 | *LEF1* | *AKT3* | 1 | *FOS* | *E2F3* | 2 |
| *JUN* | *AKT3* | 2 | *MYC* | *AKT3* | 11 | *LEF1* | *CTNNB1* | 1 | *FOS* | *GADD45G* | 1 |
| *JUN* | *SOS1* | 2 | *MYC* | *NCOA1* | 7 | *LEF1* | *PIK3CB* | 1 | *FOS* | *SP1* | 1 |
| *JUN* | *CTNNB1* | 2 | *MYC* | *SOS1* | 10 | *LEF1* | *POLK* | 1 | *FOS* | *AKT1* | 1 |
| *JUN* | *GSK3B* | 1 | *MYC* | *RAF1* | 17 | *LEF1* | *APC* | 1 | *AKT1* | *PIK3CD* | 1 |
| *JUN* | *DVL3* | 1 | *MYC* | *CTNNB1* | 12 | *LEF1* | *E2F3* | 1 | *AKT1* | *NRAS* | 1 |
| *JUN* | *APC* | 1 | *MYC* | *GSK3B* | 21 | *LEF1* | *CDKN1A* | 5 | *AKT1* | *NOTCH2* | 1 |
| *JUN* | *E2F3* | 2 | *MYC* | *PIK3CB* | 9 | *LEF1* | *CDK6* | 1 | *AKT1* | *AKT3* | 1 |
| *JUN* | *CDKN1A* | 2 | *MYC* | *DVL3* | 5 | *LEF1* | *NOTCH1* | 1 | *AKT1* | *SOS1* | 2 |
| *JUN* | *BRAF* | 2 | *MYC* | *LEF1* | 4 | *LEF1* | *RB1* | 1 | *AKT1* | *GSK3B* | 1 |
| *JUN* | *ARAF* | 1 | *MYC* | *PIK3R1* | 17 | *LEF1* | *FOS* | 1 | *AKT1* | *DVL3* | 4 |
| *JUN* | *GADD45G* | 2 | *MYC* | *POLK* | 4 | *LEF1* | *AKT1* | 1 | *AKT1* | *APC* | 2 |
| *JUN* | *HRAS* | 1 | *MYC* | *APC* | 5 | *LEF1* | *MAP2K1* | 1 | *AKT1* | *BAK1* | 2 |
| *JUN* | *PTEN* | 2 | *MYC* | *TCF7* | 6 | *LEF1* | *TP53* | 1 | *AKT1* | *CDK6* | 6 |
| *JUN* | *NFKB2* | 2 | *MYC* | *CSNK1A1* | 18 | *LEF1* | *GRB2* | 1 | *AKT1* | *BRAF* | 1 |
| *JUN* | *SP1* | 1 | *MYC* | *E2F3* | 2 | *LEF1* | *MAPK1* | 2 | *AKT1* | *HRAS* | 1 |
| *JUN* | *RB1* | 1 | *MYC* | *BAK1* | 28 | *PIK3R1* | *AKT3* | 1 | *AKT1* | *DDB2* | 2 |
| *JUN* | *AKT1* | 1 | *MYC* | *CDKN1A* | 28 | *PIK3R1* | *CDK6* | 1 | *AKT1* | *RPS6KB2* | 1 |
| *JUN* | *MAPK3* | 1 | *MYC* | *CDK6* | 29 | *PIK3R1* | *BRAF* | 2 | *AKT1* | *PTEN* | 1 |
| *JUN* | *DVL2* | 4 | *MYC* | *BRAF* | 23 | *PIK3R1* | *ARAF* | 1 | *AKT1* | *KRAS* | 5 |
| *JUN* | *TP53* | 2 | *MYC* | *ARAF* | 11 | *PIK3R1* | *DVL2* | 1 | *AKT1* | *CDK4* | 1 |
| *JUN* | *RPS6KB1* | 2 | *MYC* | *GADD45G* | 5 | *POLK* | *NOTCH2* | 1 | *AKT1* | *MAP2K1* | 1 |
| *JUN* | *NCOA3* | 2 | *MYC* | *NOTCH1* | 8 | *POLK* | *SOS1* | 1 | *AKT1* | *MAPK3* | 2 |
| *JUN* | *AKT2* | 1 | *MYC* | *HRAS* | 11 | *POLK* | *BRAF* | 1 | *AKT1* | *DVL2* | 2 |
| *JUN* | *MAPK1* | 1 | *MYC* | *DDB2* | 22 | *POLK* | *ARAF* | 1 | *AKT1* | *RPS6KB1* | 1 |
| *GADD45A* | *APC* | 1 | *MYC* | *RPS6KB2* | 28 | *POLK* | *HRAS* | 1 | *AKT1* | *GRB2* | 1 |
| *GADD45A* | *BRAF* | 1 | *MYC* | *PTEN* | 5 | *POLK* | *RPS6KB2* | 2 | *AKT1* | *MAP2K2* | 1 |
| *GADD45A* | *GADD45G* | 1 | *MYC* | *NFKB2* | 30 | *APC* | *NRAS* | 2 | *MAP2K1* | *PIK3CD* | 1 |
| *GADD45A* | *RPS6KB2* | 1 | *MYC* | *KRAS* | 25 | *APC* | *SHC1* | 1 | *MAP2K1* | *MTOR* | 1 |
| *NRAS* | *AKT3* | 1 | *MYC* | *SP1* | 7 | *APC* | *SOS1* | 1 | *MAP2K1* | *NRAS* | 2 |
| *NRAS* | *RAF1* | 2 | *MYC* | *CDK4* | 28 | *APC* | *GSK3B* | 1 | *MAP2K1* | *NOTCH2* | 1 |
| *NRAS* | *DVL3* | 1 | *MYC* | *RB1* | 15 | *APC* | *PIK3CB* | 3 | *MAP2K1* | *SHC1* | 1 |
| *NRAS* | *POLK* | 1 | *MYC* | *FOS* | 2 | *APC* | *DVL3* | 2 | *MAP2K1* | *SOS1* | 1 |
| *NRAS* | *APC* | 2 | *MYC* | *AKT1* | 7 | *APC* | *BAK1* | 1 | *MAP2K1* | *RAF1* | 1 |
| *NRAS* | *BAK1* | 1 | *MYC* | *MAP2K1* | 15 | *APC* | *CDK6* | 4 | *MAP2K1* | *GSK3B* | 1 |
| *NRAS* | *CDK6* | 1 | *MYC* | *MAPK3* | 7 | *APC* | *BRAF* | 1 | *MAP2K1* | *PIK3CB* | 2 |
| *NRAS* | *BRAF* | 1 | *MYC* | *DVL2* | 5 | *APC* | *HRAS* | 3 | *MAP2K1* | *DVL3* | 1 |
| *NRAS* | *HRAS* | 1 | *MYC* | *TP53* | 9 | *APC* | *PTEN* | 1 | *MAP2K1* | *POLK* | 1 |
| *NRAS* | *RPS6KB2* | 1 | *MYC* | *RPS6KB1* | 8 | *APC* | *CDK4* | 1 | *MAP2K1* | *BAK1* | 1 |
| *NRAS* | *MAP2K1* | 1 | *MYC* | *GRB2* | 15 | *APC* | *AKT1* | 1 | *MAP2K1* | *CDK6* | 8 |
| *NRAS* | *MAPK3* | 1 | *MYC* | *NCOA3* | 27 | *APC* | *MAPK3* | 3 | *MAP2K1* | *BRAF* | 4 |
| *NRAS* | *DVL2* | 1 | *MYC* | *GADD45B* | 29 | *APC* | *DVL2* | 2 | *MAP2K1* | *ARAF* | 1 |
| *NRAS* | *RPS6KB1* | 1 | *MYC* | *MAP2K2* | 6 | *APC* | *RPS6KB1* | 2 | *MAP2K1* | *NOTCH1* | 1 |
| *NOTCH2* | *NRAS* | 2 | *MYC* | *AKT2* | 18 | *APC* | *MAP2K2* | 1 | *MAP2K1* | *HRAS* | 1 |
| *NOTCH2* | *SHC1* | 2 | *MYC* | *BAX* | 6 | *TCF7* | *LEF1* | 1 | *MAP2K1* | *RPS6KB2* | 2 |
| *NOTCH2* | *SOS1* | 1 | *MYC* | *MAPK1* | 10 | *CSNK1A1* | *NOTCH2* | 1 | *MAP2K1* | *KRAS* | 4 |
| *NOTCH2* | *RAF1* | 1 | *GADD45G* | *SHC1* | 1 | *CSNK1A1* | *RAF1* | 1 | *MAP2K1* | *AKT1* | 2 |
| *NOTCH2* | *GSK3B* | 2 | *GADD45G* | *PIK3CB* | 1 | *CSNK1A1* | *CDK6* | 1 | *MAP2K1* | *DVL2* | 1 |
| *NOTCH2* | *DVL3* | 2 | *GADD45G* | *HRAS* | 2 | *CSNK1A1* | *BRAF* | 1 | *MAP2K1* | *RPS6KB1* | 3 |
| *NOTCH2* | *POLK* | 2 | *GADD45G* | *AKT1* | 1 | *CSNK1A1* | *RPS6KB2* | 1 | *MAP2K1* | *MAP2K2* | 1 |
| *NOTCH2* | *APC* | 2 | *GADD45G* | *DVL2* | 1 | *E2F3* | *PIK3CD* | 1 | *MAP2K1* | *AKT2* | 2 |
| *NOTCH2* | *CSNK1A1* | 1 | *GADD45G* | *RPS6KB1* | 1 | *E2F3* | *MTOR* | 1 | *MAP2K1* | *MAPK1* | 2 |
| *NOTCH2* | *CDK6* | 1 | *NOTCH1* | *MTOR* | 1 | *E2F3* | *NRAS* | 1 | *MAPK3* | *GADD45A* | 1 |
| *NOTCH2* | *BRAF* | 4 | *NOTCH1* | *SOS1* | 1 | *E2F3* | *AKT3* | 2 | *MAPK3* | *NRAS* | 4 |
| *NOTCH2* | *ARAF* | 1 | *NOTCH1* | *APC* | 1 | *E2F3* | *SOS1* | 1 | *MAPK3* | *NOTCH2* | 1 |
| *NOTCH2* | *NOTCH1* | 3 | *NOTCH1* | *CDK6* | 3 | *E2F3* | *PIK3CB* | 2 | *MAPK3* | *PIK3CB* | 1 |
| *NOTCH2* | *HRAS* | 2 | *NOTCH1* | *RPS6KB2* | 1 | *E2F3* | *DVL3* | 4 | *MAPK3* | *DVL3* | 2 |
| *NOTCH2* | *DDB2* | 1 | *NOTCH1* | *DVL2* | 2 | *E2F3* | *POLK* | 1 | *MAPK3* | *POLK* | 1 |
| *NOTCH2* | *RPS6KB2* | 6 | *HRAS* | *MTOR* | 2 | *E2F3* | *CDK6* | 2 | *MAPK3* | *BRAF* | 1 |
| *NOTCH2* | *PTEN* | 2 | *HRAS* | *NRAS* | 3 | *E2F3* | *GADD45G* | 1 | *MAPK3* | *GADD45G* | 1 |
| *NOTCH2* | *KRAS* | 2 | *HRAS* | *NOTCH2* | 1 | *E2F3* | *RPS6KB2* | 1 | *MAPK3* | *NOTCH1* | 1 |
| *NOTCH2* | *AKT1* | 1 | *HRAS* | *RAF1* | 1 | *E2F3* | *PTEN* | 1 | *MAPK3* | *HRAS* | 1 |
| *NOTCH2* | *MAPK3* | 3 | *HRAS* | *PIK3CB* | 3 | *E2F3* | *KRAS* | 1 | *MAPK3* | *AKT1* | 1 |
| *NOTCH2* | *DVL2* | 1 | *HRAS* | *DVL3* | 3 | *E2F3* | *SP1* | 1 | *MAPK3* | *DVL2* | 2 |
| *NOTCH2* | *GRB2* | 1 | *HRAS* | *BRAF* | 4 | *E2F3* | *DVL2* | 1 | *MAPK3* | *RPS6KB1* | 1 |
| *NOTCH2* | *GADD45B* | 1 | *HRAS* | *ARAF* | 1 | *E2F3* | *AKT2* | 1 | *DVL2* | *NRAS* | 1 |
| *NOTCH2* | *MAP2K2* | 2 | *HRAS* | *GADD45G* | 1 | *E2F3* | *MAPK1* | 1 | *DVL2* | *NOTCH2* | 2 |
| *NOTCH2* | *AKT2* | 1 | *HRAS* | *PTEN* | 1 | *BAK1* | *PIK3CD* | 1 | *DVL2* | *PIK3CB* | 2 |
| *NOTCH2* | *BAX* | 1 | *HRAS* | *RB1* | 1 | *BAK1* | *NOTCH2* | 3 | *DVL2* | *DVL3* | 1 |
| *NOTCH2* | *MAPK1* | 1 | *HRAS* | *MAPK3* | 1 | *BAK1* | *AKT3* | 1 | *DVL2* | *POLK* | 1 |
| *SHC1* | *NRAS* | 1 | *HRAS* | *DVL2* | 2 | *BAK1* | *RAF1* | 1 | *DVL2* | *APC* | 2 |
| *SHC1* | *NOTCH2* | 1 | *DDB2* | *NRAS* | 1 | *BAK1* | *GSK3B* | 2 | *DVL2* | *CDK6* | 1 |
| *SHC1* | *RAF1* | 1 | *DDB2* | *CDK6* | 2 | *BAK1* | *PIK3CB* | 2 | *DVL2* | *BRAF* | 3 |
| *SHC1* | *DVL3* | 1 | *DDB2* | *BRAF* | 2 | *BAK1* | *DVL3* | 1 | *DVL2* | *HRAS* | 2 |
| *SHC1* | *APC* | 1 | *DDB2* | *KRAS* | 1 | *BAK1* | *POLK* | 1 | *DVL2* | *RPS6KB2* | 2 |
| *SHC1* | *CSNK1A1* | 1 | *RPS6KB2* | *PIK3CD* | 1 | *BAK1* | *APC* | 1 | *DVL2* | *PTEN* | 1 |
| *SHC1* | *BAK1* | 1 | *RPS6KB2* | *MTOR* | 5 | *BAK1* | *CSNK1A1* | 1 | *DVL2* | *AKT1* | 1 |
| *SHC1* | *CDK6* | 3 | *RPS6KB2* | *GADD45A* | 2 | *BAK1* | *CDKN1A* | 1 | *DVL2* | *MAPK3* | 3 |
| *SHC1* | *BRAF* | 3 | *RPS6KB2* | *NRAS* | 2 | *BAK1* | *CDK6* | 4 | *DVL2* | *RPS6KB1* | 1 |
| *SHC1* | *HRAS* | 2 | *RPS6KB2* | *NOTCH2* | 2 | *BAK1* | *BRAF* | 6 | *DVL2* | *MAP2K2* | 1 |
| *SHC1* | *DDB2* | 1 | *RPS6KB2* | *SHC1* | 9 | *BAK1* | *ARAF* | 2 | *DVL2* | *MAPK1* | 1 |
| *SHC1* | *RPS6KB2* | 4 | *RPS6KB2* | *AKT3* | 9 | *BAK1* | *NOTCH1* | 3 | *TP53* | *MTOR* | 2 |
| *SHC1* | *KRAS* | 4 | *RPS6KB2* | *SOS1* | 2 | *BAK1* | *HRAS* | 2 | *TP53* | *SHC1* | 1 |
| *SHC1* | *MAP2K1* | 1 | *RPS6KB2* | *RAF1* | 2 | *BAK1* | *RPS6KB2* | 6 | *TP53* | *NCOA1* | 1 |
| *SHC1* | *MAPK3* | 1 | *RPS6KB2* | *CTNNB1* | 2 | *BAK1* | *PTEN* | 1 | *TP53* | *SOS1* | 1 |
| *SHC1* | *DVL2* | 2 | *RPS6KB2* | *GSK3B* | 7 | *BAK1* | *KRAS* | 1 | *TP53* | *RAF1* | 1 |
| *SHC1* | *GADD45B* | 1 | *RPS6KB2* | *PIK3CB* | 5 | *BAK1* | *AKT1* | 1 | *TP53* | *PIK3CB* | 3 |
| *SHC1* | *AKT2* | 1 | *RPS6KB2* | *DVL3* | 1 | *BAK1* | *MAP2K1* | 2 | *TP53* | *DVL3* | 3 |
| *AKT3* | *MTOR* | 1 | *RPS6KB2* | *POLK* | 3 | *BAK1* | *MAPK3* | 1 | *TP53* | *APC* | 2 |
| *AKT3* | *NRAS* | 2 | *RPS6KB2* | *APC* | 3 | *BAK1* | *RPS6KB1* | 1 | *TP53* | *E2F3* | 2 |
| *AKT3* | *NOTCH2* | 1 | *RPS6KB2* | *CSNK1A1* | 1 | *BAK1* | *MAP2K2* | 1 | *TP53* | *BAK1* | 1 |
| *AKT3* | *POLK* | 1 | *RPS6KB2* | *BAK1* | 8 | *BAK1* | *MAPK1* | 1 | *TP53* | *CDKN1A* | 1 |
| *AKT3* | *APC* | 1 | *RPS6KB2* | *CDKN1A* | 4 | *CDK6* | *MTOR* | 1 | *TP53* | *CDK6* | 4 |
| *AKT3* | *CDK6* | 1 | *RPS6KB2* | *CDK6* | 11 | *CDK6* | *GADD45A* | 1 | *TP53* | *BRAF* | 3 |
| *AKT3* | *BRAF* | 2 | *RPS6KB2* | *BRAF* | 13 | *CDK6* | *NRAS* | 1 | *TP53* | *ARAF* | 1 |
| *AKT3* | *HRAS* | 2 | *RPS6KB2* | *ARAF* | 6 | *CDK6* | *NOTCH2* | 4 | *TP53* | *MYC* | 6 |
| *AKT3* | *RPS6KB2* | 1 | *RPS6KB2* | *GADD45G* | 2 | *CDK6* | *SHC1* | 1 | *TP53* | *NOTCH1* | 1 |
| *AKT3* | *PTEN* | 1 | *RPS6KB2* | *NOTCH1* | 2 | *CDK6* | *AKT3* | 1 | *TP53* | *HRAS* | 3 |
| *AKT3* | *KRAS* | 1 | *RPS6KB2* | *HRAS* | 1 | *CDK6* | *SOS1* | 3 | *TP53* | *PTEN* | 1 |
| *AKT3* | *CDK4* | 1 | *RPS6KB2* | *DDB2* | 2 | *CDK6* | *RAF1* | 2 | *TP53* | *KRAS* | 1 |
| *AKT3* | *RB1* | 1 | *RPS6KB2* | *PTEN* | 2 | *CDK6* | *GSK3B* | 2 | *TP53* | *SP1* | 1 |
| *AKT3* | *MAP2K1* | 1 | *RPS6KB2* | *KRAS* | 12 | *CDK6* | *PIK3CB* | 5 | *TP53* | *RB1* | 3 |
| *AKT3* | *MAPK3* | 2 | *RPS6KB2* | *RB1* | 1 | *CDK6* | *DVL3* | 1 | *TP53* | *MAP2K1* | 1 |
| *AKT3* | *DVL2* | 2 | *RPS6KB2* | *AKT1* | 3 | *CDK6* | *POLK* | 2 | *TP53* | *MAPK3* | 5 |
| *AKT3* | *RPS6KB1* | 1 | *RPS6KB2* | *MAP2K1* | 10 | *CDK6* | *APC* | 3 | *TP53* | *DVL2* | 3 |
| *AKT3* | *MAP2K2* | 1 | *RPS6KB2* | *MAPK3* | 2 | *CDK6* | *CSNK1A1* | 1 | *TP53* | *MAP2K2* | 2 |
| *NCOA1* | *NOTCH2* | 2 | *RPS6KB2* | *DVL2* | 1 | *CDK6* | *BAK1* | 1 | *TP53* | *MAPK1* | 1 |
| *NCOA1* | *SOS1* | 1 | *RPS6KB2* | *RPS6KB1* | 3 | *CDK6* | *CDKN1A* | 9 | *RPS6KB1* | *NOTCH2* | 1 |
| *NCOA1* | *POLK* | 1 | *RPS6KB2* | *GRB2* | 3 | *CDK6* | *BRAF* | 7 | *RPS6KB1* | *AKT3* | 1 |
| *NCOA1* | *APC* | 1 | *RPS6KB2* | *NCOA3* | 3 | *CDK6* | *ARAF* | 2 | *RPS6KB1* | *SOS1* | 1 |
| *NCOA1* | *CDK6* | 3 | *RPS6KB2* | *GADD45B* | 8 | *CDK6* | *NOTCH1* | 2 | *RPS6KB1* | *RAF1* | 1 |
| *NCOA1* | *BRAF* | 1 | *RPS6KB2* | *MAP2K2* | 4 | *CDK6* | *HRAS* | 2 | *RPS6KB1* | *PIK3CB* | 1 |
| *NCOA1* | *MYC* | 1 | *RPS6KB2* | *AKT2* | 1 | *CDK6* | *RPS6KB2* | 2 | *RPS6KB1* | *DVL3* | 3 |
| *NCOA1* | *KRAS* | 1 | *RPS6KB2* | *MAPK1* | 3 | *CDK6* | *PTEN* | 1 | *RPS6KB1* | *BAK1* | 1 |
| *NCOA1* | *AKT1* | 1 | *PTEN* | *NRAS* | 1 | *CDK6* | *KRAS* | 2 | *RPS6KB1* | *CDK6* | 2 |
| *NCOA1* | *MAP2K1* | 1 | *PTEN* | *PIK3CB* | 1 | *CDK6* | *CDK4* | 1 | *RPS6KB1* | *BRAF* | 1 |
| *SOS1* | *NRAS* | 1 | *PTEN* | *CDK6* | 1 | *CDK6* | *AKT1* | 1 | *RPS6KB1* | *NOTCH1* | 2 |
| *SOS1* | *NOTCH2* | 1 | *PTEN* | *HRAS* | 1 | *CDK6* | *MAP2K1* | 3 | *RPS6KB1* | *HRAS* | 2 |
| *SOS1* | *PIK3CB* | 1 | *PTEN* | *RPS6KB2* | 1 | *CDK6* | *MAPK3* | 3 | *RPS6KB1* | *RPS6KB2* | 1 |
| *SOS1* | *DVL3* | 2 | *PTEN* | *KRAS* | 1 | *CDK6* | *DVL2* | 6 | *RPS6KB1* | *KRAS* | 2 |
| *SOS1* | *APC* | 2 | *KRAS* | *MTOR* | 4 | *CDK6* | *RPS6KB1* | 5 | *RPS6KB1* | *RB1* | 1 |
| *SOS1* | *CDK6* | 1 | *KRAS* | *GADD45A* | 4 | *CDK6* | *GADD45B* | 2 | *RPS6KB1* | *MAPK3* | 1 |
| *SOS1* | *BRAF* | 2 | *KRAS* | *NRAS* | 2 | *CDK6* | *MAP2K2* | 1 | *RPS6KB1* | *MAP2K2* | 1 |
| *SOS1* | *ARAF* | 1 | *KRAS* | *NOTCH2* | 6 | *CDK6* | *MAPK1* | 4 | *GRB2* | *BRAF* | 1 |
| *SOS1* | *HRAS* | 1 | *KRAS* | *SHC1* | 7 | *BRAF* | *PIK3CD* | 5 | *NCOA3* | *MTOR* | 1 |
| *SOS1* | *RPS6KB2* | 2 | *KRAS* | *AKT3* | 3 | *BRAF* | *MTOR* | 2 | *NCOA3* | *SOS1* | 1 |
| *SOS1* | *AKT1* | 1 | *KRAS* | *SOS1* | 6 | *BRAF* | *GADD45A* | 3 | *GADD45B* | *PIK3CB* | 1 |
| *SOS1* | *MAP2K1* | 1 | *KRAS* | *RAF1* | 3 | *BRAF* | *NRAS* | 4 | *GADD45B* | *PIK3R1* | 1 |
| *SOS1* | *DVL2* | 1 | *KRAS* | *CTNNB1* | 2 | *BRAF* | *NOTCH2* | 2 | *GADD45B* | *APC* | 1 |
| *SOS1* | *MAP2K2* | 1 | *KRAS* | *GSK3B* | 2 | *BRAF* | *SHC1* | 6 | *GADD45B* | *BRAF* | 1 |
| *RAF1* | *PIK3CB* | 3 | *KRAS* | *PIK3CB* | 3 | *BRAF* | *AKT3* | 4 | *GADD45B* | *MAPK1* | 1 |
| *RAF1* | *DVL3* | 1 | *KRAS* | *DVL3* | 3 | *BRAF* | *SOS1* | 4 | *MAP2K2* | *NRAS* | 1 |
| *RAF1* | *PIK3R1* | 1 | *KRAS* | *PIK3R1* | 2 | *BRAF* | *RAF1* | 9 | *MAP2K2* | *NOTCH2* | 2 |
| *RAF1* | *POLK* | 1 | *KRAS* | *POLK* | 4 | *BRAF* | *CTNNB1* | 1 | *MAP2K2* | *AKT3* | 1 |
| *RAF1* | *CDK6* | 3 | *KRAS* | *APC* | 6 | *BRAF* | *GSK3B* | 12 | *MAP2K2* | *PIK3CB* | 1 |
| *RAF1* | *BRAF* | 1 | *KRAS* | *CSNK1A1* | 2 | *BRAF* | *PIK3CB* | 2 | *MAP2K2* | *DVL3* | 1 |
| *RAF1* | *NOTCH1* | 1 | *KRAS* | *BAK1* | 10 | *BRAF* | *DVL3* | 3 | *MAP2K2* | *APC* | 1 |
| *RAF1* | *RPS6KB2* | 1 | *KRAS* | *CDKN1A* | 10 | *BRAF* | *PIK3R1* | 6 | *MAP2K2* | *CDK6* | 2 |
| *RAF1* | *KRAS* | 1 | *KRAS* | *CDK6* | 12 | *BRAF* | *POLK* | 1 | *MAP2K2* | *ARAF* | 1 |
| *RAF1* | *MAP2K2* | 1 | *KRAS* | *BRAF* | 14 | *BRAF* | *APC* | 7 | *MAP2K2* | *HRAS* | 1 |
| *GSK3B* | *SOS1* | 1 | *KRAS* | *ARAF* | 5 | *BRAF* | *CSNK1A1* | 3 | *MAP2K2* | *PTEN* | 1 |
| *GSK3B* | *POLK* | 1 | *KRAS* | *GADD45G* | 5 | *BRAF* | *BAK1* | 16 | *MAP2K2* | *MAP2K1* | 1 |
| *GSK3B* | *BAK1* | 1 | *KRAS* | *NOTCH1* | 4 | *BRAF* | *CDKN1A* | 13 | *MAP2K2* | *DVL2* | 1 |
| *GSK3B* | *CDK6* | 2 | *KRAS* | *HRAS* | 2 | *BRAF* | *CDK6* | 15 | *MAP2K2* | *AKT2* | 1 |
| *GSK3B* | *ARAF* | 1 | *KRAS* | *DDB2* | 3 | *BRAF* | *ARAF* | 7 | *AKT2* | *MTOR* | 1 |
| *GSK3B* | *HRAS* | 2 | *KRAS* | *RPS6KB2* | 4 | *BRAF* | *GADD45G* | 1 | *AKT2* | *NRAS* | 1 |
| *GSK3B* | *RPS6KB2* | 3 | *KRAS* | *PTEN* | 1 | *BRAF* | *NOTCH1* | 3 | *AKT2* | *SHC1* | 1 |
| *GSK3B* | *KRAS* | 2 | *KRAS* | *CDK4* | 1 | *BRAF* | *HRAS* | 7 | *AKT2* | *AKT3* | 1 |
| *GSK3B* | *DVL2* | 2 | *KRAS* | *RB1* | 7 | *BRAF* | *DDB2* | 5 | *AKT2* | *RAF1* | 1 |
| *PIK3CB* | *PIK3CD* | 1 | *KRAS* | *AKT1* | 4 | *BRAF* | *RPS6KB2* | 20 | *AKT2* | *PIK3CB* | 2 |
| *PIK3CB* | *GADD45A* | 1 | *KRAS* | *MAP2K1* | 2 | *BRAF* | *KRAS* | 9 | *AKT2* | *DVL3* | 1 |
| *PIK3CB* | *NRAS* | 1 | *KRAS* | *MAPK3* | 1 | *BRAF* | *CDK4* | 15 | *AKT2* | *APC* | 1 |
| *PIK3CB* | *AKT3* | 3 | *KRAS* | *DVL2* | 3 | *BRAF* | *RB1* | 3 | *AKT2* | *CDK6* | 2 |
| *PIK3CB* | *DVL3* | 1 | *KRAS* | *RPS6KB1* | 5 | *BRAF* | *AKT1* | 5 | *AKT2* | *BRAF* | 1 |
| *PIK3CB* | *BRAF* | 3 | *KRAS* | *NCOA3* | 4 | *BRAF* | *MAP2K1* | 5 | *AKT2* | *ARAF* | 1 |
| *PIK3CB* | *GADD45G* | 1 | *KRAS* | *GADD45B* | 4 | *BRAF* | *MAPK3* | 2 | *AKT2* | *RPS6KB2* | 1 |
| *PIK3CB* | *NOTCH1* | 2 | *KRAS* | *MAP2K2* | 6 | *BRAF* | *DVL2* | 3 | *AKT2* | *AKT1* | 1 |
| *PIK3CB* | *DDB2* | 1 | *KRAS* | *AKT2* | 6 | *BRAF* | *RPS6KB1* | 5 | *AKT2* | *DVL2* | 2 |
| *PIK3CB* | *RPS6KB2* | 3 | *KRAS* | *MAPK1* | 4 | *BRAF* | *GRB2* | 1 | *AKT2* | *RPS6KB1* | 2 |
| *PIK3CB* | *KRAS* | 1 | *SP1* | *PIK3CD* | 1 | *BRAF* | *NCOA3* | 12 | *AKT2* | *MAP2K2* | 1 |
| *PIK3CB* | *MAPK3* | 4 | *SP1* | *MTOR* | 1 | *BRAF* | *GADD45B* | 18 | *MAPK1* | *MTOR* | 1 |
| *PIK3CB* | *DVL2* | 2 | *SP1* | *NRAS* | 1 | *BRAF* | *MAP2K2* | 5 | *MAPK1* | *NOTCH2* | 1 |
| *PIK3CB* | *RPS6KB1* | 2 | *SP1* | *NOTCH2* | 1 | *BRAF* | *AKT2* | 8 | *MAPK1* | *AKT3* | 1 |
| *PIK3CB* | *AKT2* | 1 | *SP1* | *AKT3* | 3 | *BRAF* | *MAPK1* | 3 | *MAPK1* | *SOS1* | 1 |
| *DVL3* | *MTOR* | 1 | *SP1* | *SOS1* | 2 | *ARAF* | *MTOR* | 1 | *MAPK1* | *BAK1* | 1 |
| *DVL3* | *NRAS* | 1 | *SP1* | *GSK3B* | 1 | *ARAF* | *NRAS* | 1 | *MAPK1* | *CDK6* | 3 |
| *DVL3* | *NOTCH2* | 1 | *SP1* | *POLK* | 1 | *ARAF* | *NOTCH2* | 3 | *MAPK1* | *BRAF* | 2 |
| *DVL3* | *AKT3* | 1 | *SP1* | *APC* | 1 | *ARAF* | *SHC1* | 1 | *MAPK1* | *HRAS* | 2 |
| *DVL3* | *SOS1* | 1 | *SP1* | *TCF7* | 1 | *ARAF* | *AKT3* | 3 | *MAPK1* | *RPS6KB2* | 2 |
| *DVL3* | *GSK3B* | 1 | *SP1* | *CDK6* | 1 | *ARAF* | *SOS1* | 1 | *MAPK1* | *KRAS* | 2 |
| *DVL3* | *PIK3CB* | 2 | *SP1* | *BRAF* | 2 | *MAPK1* | *AKT1* | 2 | *MAPK1* | *RB1* | 1 |

**Supplementary Table S4.** Gene regulatory networks in breast cancer B cells.

| **Source** | **Target** | **Wei**  **ght** | **Source** | **Target** | **Wei**  **ght** | **Source** | **Target** | **Wei**  **ght** | **Source** | **Target** | **Wei**  **ght** |
| --- | --- | --- | --- | --- | --- | --- | --- | --- | --- | --- | --- |
| *DVL1* | *MTOR* | 4 | *ESR1* | *PIK3CA* | 29 | *SOS1* | *PTEN* | 1 | *SP1* | *PTEN* | 7 |
| *DVL1* | *GADD45A* | 2 | *ESR1* | *DVL3* | 6 | *SOS1* | *CDK4* | 1 | *SP1* | *NFKB2* | 2 |
| *DVL1* | *WNT10A* | 7 | *ESR1* | *LEF1* | 1 | *SOS1* | *IGF1* | 2 | *SP1* | *IGF1* | 3 |
| *DVL1* | *PIK3CA* | 28 | *ESR1* | *POLK* | 2 | *SOS1* | *BRCA2* | 1 | *SP1* | *BRCA2* | 19 |
| *DVL1* | *DVL3* | 6 | *ESR1* | *E2F3* | 24 | *SOS1* | *AKT1* | 1 | *SP1* | *ESR2* | 10 |
| *DVL1* | *POLK* | 1 | *ESR1* | *CDKN1A* | 1 | *SOS1* | *DVL2* | 2 | *SP1* | *AKT1* | 6 |
| *DVL1* | *BRAF* | 27 | *ESR1* | *BRAF* | 27 | *SOS1* | *RPS6KB1* | 2 | *SP1* | *MAP2K1* | 9 |
| *DVL1* | *FZD3* | 28 | *ESR1* | *FZD3* | 29 | *SOS1* | *MAP2K2* | 7 | *SP1* | *DVL2* | 12 |
| *DVL1* | *FZD6* | 27 | *ESR1* | *FZD6* | 26 | *SOS1* | *AKT2* | 3 | *SP1* | *TP53* | 1 |
| *DVL1* | *HRAS* | 8 | *ESR1* | *HRAS* | 10 | *SOS1* | *MAPK1* | 7 | *SP1* | *RPS6KB1* | 15 |
| *DVL1* | *IGF1* | 1 | *ESR1* | *SP1* | 2 | *WNT10A* | *DVL1* | 3 | *SP1* | *MAP2K2* | 18 |
| *DVL1* | *BRCA2* | 5 | *ESR1* | *IGF1* | 6 | *WNT10A* | *MTOR* | 15 | *SP1* | *AKT2* | 9 |
| *DVL1* | *DVL2* | 28 | *ESR1* | *BRCA2* | 13 | *WNT10A* | *PIK3R3* | 24 | *SP1* | *MAPK1* | 2 |
| *DVL1* | *RPS6KB1* | 5 | *ESR1* | *ESR2* | 27 | *WNT10A* | *GADD45A* | 7 | *CDK4* | *GADD45B* | 14 |
| *DVL1* | *GADD45B* | 1 | *ESR1* | *FOS* | 1 | *WNT10A* | *AKT3* | 9 | *IGF1* | *MTOR* | 5 |
| *DVL1* | *MAP2K2* | 1 | *ESR1* | *DVL2* | 23 | *WNT10A* | *SOS1* | 1 | *IGF1* | *GADD45A* | 4 |
| *DVL1* | *AKT2* | 2 | *ESR1* | *RPS6KB1* | 8 | *WNT10A* | *PIK3CA* | 16 | *IGF1* | *AKT3* | 5 |
| *MTOR* | *DVL1* | 2 | *ESR1* | *GADD45B* | 1 | *WNT10A* | *DVL3* | 21 | *IGF1* | *WNT10A* | 1 |
| *MTOR* | *PIK3R3* | 1 | *ESR1* | *MAP2K2* | 1 | *WNT10A* | *POLK* | 6 | *IGF1* | *DVL3* | 3 |
| *MTOR* | *AKT3* | 2 | *CDK6* | *MTOR* | 1 | *WNT10A* | *APC* | 1 | *IGF1* | *PIK3R1* | 1 |
| *MTOR* | *PIK3CA* | 1 | *CDK6* | *WNT10A* | 1 | *WNT10A* | *BAK1* | 3 | *IGF1* | *APC* | 1 |
| *MTOR* | *DVL3* | 2 | *CDK6* | *PIK3CA* | 2 | *WNT10A* | *CDK6* | 1 | *IGF1* | *BRAF* | 1 |
| *MTOR* | *BRAF* | 2 | *CDK6* | *DVL3* | 1 | *WNT10A* | *BRAF* | 14 | *IGF1* | *FZD6* | 2 |
| *MTOR* | *FZD6* | 1 | *CDK6* | *POLK* | 1 | *WNT10A* | *FZD3* | 20 | *IGF1* | *NOTCH1* | 7 |
| *MTOR* | *NOTCH1* | 2 | *CDK6* | *FZD3* | 1 | *WNT10A* | *FZD6* | 18 | *IGF1* | *HRAS* | 2 |
| *MTOR* | *HRAS* | 1 | *CDK6* | *FZD6* | 1 | *WNT10A* | *NOTCH1* | 4 | *IGF1* | *DDB2* | 4 |
| *MTOR* | *IGF1* | 2 | *CDK6* | *BRCA2* | 1 | *WNT10A* | *HRAS* | 25 | *IGF1* | *PTEN* | 2 |
| *MTOR* | *BRCA2* | 2 | *CDK6* | *RPS6KB1* | 1 | *WNT10A* | *CDK4* | 1 | *IGF1* | *AKT1* | 4 |
| *MTOR* | *MAP2K1* | 2 | *CDK6* | *MAP2K2* | 1 | *WNT10A* | *IGF1* | 8 | *IGF1* | *MAP2K1* | 2 |
| *MTOR* | *DVL2* | 3 | *BRAF* | *DVL1* | 22 | *WNT10A* | *BRCA2* | 27 | *IGF1* | *RPS6KB1* | 3 |
| *MTOR* | *RPS6KB1* | 5 | *BRAF* | *MTOR* | 2 | *WNT10A* | *AKT1* | 1 | *IGF1* | *MAP2K2* | 16 |
| *PIK3R3* | *MTOR* | 1 | *BRAF* | *PIK3R3* | 1 | *WNT10A* | *MAP2K1* | 3 | *BRCA2* | *DVL1* | 3 |
| *PIK3R3* | *GADD45A* | 2 | *BRAF* | *AKT3* | 3 | *WNT10A* | *DVL2* | 24 | *BRCA2* | *MTOR* | 1 |
| *PIK3R3* | *AKT3* | 4 | *BRAF* | *PIK3CA* | 16 | *WNT10A* | *RPS6KB1* | 22 | *BRCA2* | *PIK3R3* | 4 |
| *PIK3R3* | *WNT10A* | 4 | *BRAF* | *DVL3* | 4 | *WNT10A* | *MAP2K2* | 4 | *BRCA2* | *AKT3* | 1 |
| *PIK3R3* | *PIK3CA* | 2 | *BRAF* | *FZD3* | 17 | *RAF1* | *MTOR* | 4 | *BRCA2* | *WNT10A* | 3 |
| *PIK3R3* | *DVL3* | 1 | *BRAF* | *FZD6* | 16 | *RAF1* | *PIK3CB* | 2 | *BRCA2* | *DVL3* | 3 |
| *PIK3R3* | *POLK* | 1 | *BRAF* | *HRAS* | 3 | *RAF1* | *POLK* | 2 | *BRCA2* | *BRAF* | 3 |
| *PIK3R3* | *CDK6* | 2 | *BRAF* | *RPS6KB2* | 1 | *RAF1* | *CDK6* | 1 | *BRCA2* | *FZD3* | 2 |
| *PIK3R3* | *BRAF* | 2 | *BRAF* | *IGF1* | 1 | *RAF1* | *FZD3* | 2 | *BRCA2* | *FZD6* | 8 |
| *PIK3R3* | *FZD3* | 3 | *BRAF* | *BRCA2* | 8 | *RAF1* | *HRAS* | 1 | *BRCA2* | *NOTCH1* | 1 |
| *PIK3R3* | *FZD6* | 2 | *BRAF* | *DVL2* | 18 | *RAF1* | *DDB2* | 1 | *BRCA2* | *HRAS* | 1 |
| *PIK3R3* | *HRAS* | 5 | *BRAF* | *RPS6KB1* | 5 | *RAF1* | *IGF1* | 1 | *BRCA2* | *IGF1* | 2 |
| *PIK3R3* | *IGF1* | 1 | *BRAF* | *MAP2K2* | 2 | *RAF1* | *BRCA2* | 2 | *BRCA2* | *DVL2* | 7 |
| *PIK3R3* | *BRCA2* | 4 | *FZD3* | *DVL1* | 29 | *RAF1* | *RPS6KB1* | 4 | *BRCA2* | *RPS6KB1* | 2 |
| *PIK3R3* | *MAP2K1* | 2 | *FZD3* | *MTOR* | 3 | *RAF1* | *MAP2K2* | 2 | *ESR2* | *DVL1* | 24 |
| *PIK3R3* | *DVL2* | 5 | *FZD3* | *PIK3R3* | 1 | *RAF1* | *MAPK1* | 1 | *ESR2* | *PIK3R3* | 3 |
| *PIK3R3* | *RPS6KB1* | 2 | *FZD3* | *GADD45A* | 1 | *CTNNB1* | *DVL3* | 2 | *ESR2* | *GADD45A* | 1 |
| *PIK3R3* | *MAP2K2* | 2 | *FZD3* | *AKT3* | 2 | *CTNNB1* | *POLK* | 1 | *ESR2* | *AKT3* | 8 |
| *JUN* | *PIK3CD* | 29 | *FZD3* | *WNT10A* | 9 | *CTNNB1* | *ARAF* | 12 | *ESR2* | *NCOA1* | 6 |
| *JUN* | *PIK3R3* | 13 | *FZD3* | *PIK3CA* | 26 | *CTNNB1* | *HRAS* | 1 | *ESR2* | *WNT10A* | 6 |
| *JUN* | *GADD45A* | 17 | *FZD3* | *DVL3* | 10 | *CTNNB1* | *RB1* | 1 | *ESR2* | *RAF1* | 1 |
| *JUN* | *NOTCH2* | 1 | *FZD3* | *POLK* | 3 | *CTNNB1* | *BAX* | 1 | *ESR2* | *PIK3CA* | 20 |
| *JUN* | *AKT3* | 18 | *FZD3* | *BRAF* | 20 | *CTNNB1* | *MAPK1* | 4 | *ESR2* | *DVL3* | 3 |
| *JUN* | *NCOA1* | 9 | *FZD3* | *FZD6* | 22 | *GSK3B* | *DVL1* | 1 | *ESR2* | *LEF1* | 3 |
| *JUN* | *WNT10A* | 2 | *FZD3* | *HRAS* | 8 | *GSK3B* | *DVL2* | 1 | *ESR2* | *POLK* | 2 |
| *JUN* | *PIK3CB* | 1 | *FZD3* | *IGF1* | 1 | *PIK3CB* | *AKT3* | 1 | *ESR2* | *E2F3* | 19 |
| *JUN* | *DVL3* | 2 | *FZD3* | *BRCA2* | 10 | *PIK3CB* | *FZD6* | 1 | *ESR2* | *CDKN1A* | 1 |
| *JUN* | *POLK* | 2 | *FZD3* | *DVL2* | 28 | *PIK3CB* | *DVL2* | 1 | *ESR2* | *ESR1* | 17 |
| *JUN* | *E2F3* | 5 | *FZD3* | *RPS6KB1* | 2 | *PIK3CA* | *DVL1* | 29 | *ESR2* | *CDK6* | 1 |
| *JUN* | *CDKN1A* | 18 | *FZD6* | *DVL1* | 23 | *PIK3CA* | *PIK3R3* | 2 | *ESR2* | *BRAF* | 10 |
| *JUN* | *CDK6* | 6 | *FZD6* | *MTOR* | 3 | *PIK3CA* | *GADD45A* | 2 | *ESR2* | *FZD3* | 14 |
| *JUN* | *BRAF* | 1 | *FZD6* | *PIK3R3* | 2 | *PIK3CA* | *AKT3* | 2 | *ESR2* | *FZD6* | 10 |
| *JUN* | *FZD6* | 1 | *FZD6* | *SHC1* | 1 | *PIK3CA* | *WNT10A* | 5 | *ESR2* | *HRAS* | 7 |
| *JUN* | *NOTCH1* | 4 | *FZD6* | *WNT10A* | 5 | *PIK3CA* | *GSK3B* | 1 | *ESR2* | *SP1* | 1 |
| *JUN* | *HRAS* | 4 | *FZD6* | *PIK3CA* | 20 | *PIK3CA* | *DVL3* | 6 | *ESR2* | *IGF1* | 1 |
| *JUN* | *DDB2* | 7 | *FZD6* | *DVL3* | 6 | *PIK3CA* | *BRAF* | 21 | *ESR2* | *BRCA2* | 3 |
| *JUN* | *PTEN* | 10 | *FZD6* | *BRAF* | 15 | *PIK3CA* | *FZD3* | 27 | *ESR2* | *MAP2K1* | 4 |
| *JUN* | *SP1* | 30 | *FZD6* | *FZD3* | 24 | *PIK3CA* | *FZD6* | 30 | *ESR2* | *DVL2* | 16 |
| *JUN* | *IGF1* | 18 | *FZD6* | *HRAS* | 5 | *PIK3CA* | *HRAS* | 4 | *ESR2* | *TP53* | 1 |
| *JUN* | *BRCA2* | 1 | *FZD6* | *BRCA2* | 7 | *PIK3CA* | *BRCA2* | 3 | *ESR2* | *RPS6KB1* | 2 |
| *JUN* | *ESR2* | 7 | *FZD6* | *MAP2K1* | 2 | *PIK3CA* | *DVL2* | 27 | *ESR2* | *MAP2K2* | 2 |
| *JUN* | *AKT1* | 30 | *FZD6* | *DVL2* | 20 | *PIK3CA* | *RPS6KB1* | 3 | *AKT1* | *MTOR* | 4 |
| *JUN* | *MAP2K1* | 30 | *MYC* | *DVL1* | 1 | *DVL3* | *DVL1* | 1 | *AKT1* | *WNT10A* | 2 |
| *JUN* | *DVL2* | 2 | *MYC* | *ESR1* | 2 | *DVL3* | *MTOR* | 1 | *AKT1* | *PIK3CB* | 3 |
| *JUN* | *TP53* | 2 | *NOTCH1* | *PIK3R3* | 1 | *DVL3* | *PIK3R3* | 2 | *AKT1* | *DVL3* | 1 |
| *JUN* | *RPS6KB1* | 1 | *NOTCH1* | *WNT10A* | 2 | *DVL3* | *WNT10A* | 6 | *AKT1* | *CDK6* | 1 |
| *JUN* | *GADD45B* | 12 | *NOTCH1* | *PIK3CA* | 1 | *DVL3* | *PIK3CA* | 1 | *AKT1* | *NOTCH1* | 1 |
| *JUN* | *MAP2K2* | 28 | *NOTCH1* | *DVL3* | 2 | *DVL3* | *POLK* | 2 | *AKT1* | *HRAS* | 1 |
| *JUN* | *MAPK1* | 19 | *NOTCH1* | *FZD3* | 1 | *DVL3* | *BRAF* | 1 | *AKT1* | *IGF1* | 1 |
| *GADD45A* | *DVL1* | 1 | *NOTCH1* | *FZD6* | 1 | *DVL3* | *FZD3* | 6 | *AKT1* | *DVL2* | 1 |
| *GADD45A* | *MTOR* | 15 | *NOTCH1* | *HRAS* | 1 | *DVL3* | *FZD6* | 6 | *AKT1* | *RPS6KB1* | 2 |
| *GADD45A* | *PIK3R3* | 20 | *NOTCH1* | *DVL2* | 3 | *DVL3* | *NOTCH1* | 2 | *AKT1* | *MAP2K2* | 2 |
| *GADD45A* | *NOTCH2* | 1 | *HRAS* | *DVL1* | 4 | *DVL3* | *HRAS* | 2 | *MAP2K1* | *DVL1* | 2 |
| *GADD45A* | *AKT3* | 9 | *HRAS* | *MTOR* | 5 | *DVL3* | *IGF1* | 1 | *MAP2K1* | *PIK3CD* | 1 |
| *GADD45A* | *WNT10A* | 2 | *HRAS* | *PIK3R3* | 9 | *DVL3* | *BRCA2* | 4 | *MAP2K1* | *MTOR* | 8 |
| *GADD45A* | *PIK3CA* | 2 | *HRAS* | *GADD45A* | 2 | *DVL3* | *MAP2K1* | 1 | *MAP2K1* | *PIK3R3* | 4 |
| *GADD45A* | *DVL3* | 11 | *HRAS* | *SHC1* | 1 | *DVL3* | *DVL2* | 2 | *MAP2K1* | *GADD45A* | 4 |
| *GADD45A* | *POLK* | 12 | *HRAS* | *AKT3* | 2 | *DVL3* | *RPS6KB1* | 3 | *MAP2K1* | *NOTCH2* | 1 |
| *GADD45A* | *APC* | 4 | *HRAS* | *WNT10A* | 7 | *LEF1* | *MTOR* | 2 | *MAP2K1* | *AKT3* | 6 |
| *GADD45A* | *CDK6* | 1 | *HRAS* | *PIK3CA* | 5 | *LEF1* | *PIK3R3* | 2 | *MAP2K1* | *RAF1* | 4 |
| *GADD45A* | *BRAF* | 2 | *HRAS* | *DVL3* | 8 | *LEF1* | *DVL3* | 1 | *MAP2K1* | *PIK3CB* | 4 |
| *GADD45A* | *FZD3* | 1 | *HRAS* | *POLK* | 1 | *LEF1* | *E2F3* | 1 | *MAP2K1* | *DVL3* | 6 |
| *GADD45A* | *FZD6* | 7 | *HRAS* | *CDK6* | 1 | *LEF1* | *FZD3* | 1 | *MAP2K1* | *POLK* | 11 |
| *GADD45A* | *NOTCH1* | 8 | *HRAS* | *BRAF* | 7 | *LEF1* | *FZD6* | 1 | *MAP2K1* | *APC* | 2 |
| *GADD45A* | *HRAS* | 10 | *HRAS* | *FZD3* | 3 | *LEF1* | *NOTCH1* | 1 | *MAP2K1* | *CDK6* | 1 |
| *GADD45A* | *DDB2* | 5 | *HRAS* | *FZD6* | 12 | *LEF1* | *IGF1* | 2 | *MAP2K1* | *ARAF* | 1 |
| *GADD45A* | *PTEN* | 1 | *HRAS* | *PTEN* | 1 | *LEF1* | *GRB2* | 6 | *MAP2K1* | *FZD3* | 3 |
| *GADD45A* | *IGF1* | 4 | *HRAS* | *BRCA2* | 6 | *LEF1* | *NCOA3* | 3 | *MAP2K1* | *FZD6* | 2 |
| *GADD45A* | *BRCA2* | 6 | *HRAS* | *AKT1* | 1 | *PIK3R1* | *PIK3CB* | 1 | *MAP2K1* | *NOTCH1* | 5 |
| *GADD45A* | *AKT1* | 1 | *HRAS* | *MAP2K1* | 3 | *PIK3R1* | *MAPK1* | 1 | *MAP2K1* | *HRAS* | 7 |
| *GADD45A* | *MAP2K1* | 2 | *HRAS* | *DVL2* | 11 | *POLK* | *DVL1* | 2 | *MAP2K1* | *DDB2* | 11 |
| *GADD45A* | *DVL2* | 5 | *HRAS* | *RPS6KB1* | 2 | *POLK* | *WNT10A* | 1 | *MAP2K1* | *PTEN* | 2 |
| *GADD45A* | *RPS6KB1* | 4 | *HRAS* | *MAP2K2* | 1 | *POLK* | *DVL3* | 1 | *MAP2K1* | *IGF1* | 1 |
| *GADD45A* | *MAP2K2* | 13 | *DDB2* | *DVL1* | 2 | *POLK* | *HRAS* | 1 | *MAP2K1* | *BRCA2* | 3 |
| *NRAS* | *PIK3CB* | 1 | *DDB2* | *AKT3* | 1 | *POLK* | *BRCA2* | 1 | *MAP2K1* | *AKT1* | 2 |
| *NRAS* | *ARAF* | 1 | *DDB2* | *PIK3CA* | 1 | *APC* | *DVL1* | 2 | *MAP2K1* | *DVL2* | 3 |
| *NRAS* | *MAPK1* | 5 | *DDB2* | *POLK* | 1 | *APC* | *MTOR* | 3 | *MAP2K1* | *RPS6KB1* | 6 |
| *NOTCH2* | *DVL1* | 1 | *DDB2* | *NOTCH1* | 1 | *APC* | *NOTCH2* | 4 | *MAP2K1* | *MAP2K2* | 10 |
| *NOTCH2* | *MTOR* | 1 | *DDB2* | *BRCA2* | 1 | *APC* | *AKT3* | 1 | *MAP2K1* | *AKT2* | 1 |
| *NOTCH2* | *AKT3* | 1 | *DDB2* | *MAP2K1* | 1 | *APC* | *WNT10A* | 1 | *MAP2K1* | *MAPK1* | 4 |
| *NOTCH2* | *RAF1* | 1 | *DDB2* | *DVL2* | 2 | *APC* | *RAF1* | 2 | *DVL2* | *DVL1* | 23 |
| *NOTCH2* | *CTNNB1* | 1 | *DDB2* | *MAP2K2* | 1 | *APC* | *PIK3CB* | 5 | *DVL2* | *MTOR* | 7 |
| *NOTCH2* | *PIK3CA* | 2 | *RPS6KB2* | *GADD45B* | 28 | *APC* | *PIK3CA* | 1 | *DVL2* | *PIK3R3* | 2 |
| *NOTCH2* | *DVL3* | 3 | *CCND1* | *MTOR* | 5 | *APC* | *DVL3* | 2 | *DVL2* | *AKT3* | 1 |
| *NOTCH2* | *POLK* | 3 | *CCND1* | *PIK3R3* | 3 | *APC* | *POLK* | 25 | *DVL2* | *WNT10A* | 6 |
| *NOTCH2* | *APC* | 2 | *CCND1* | *NOTCH2* | 3 | *APC* | *BAK1* | 8 | *DVL2* | *PIK3CA* | 21 |
| *NOTCH2* | *BRAF* | 1 | *CCND1* | *RAF1* | 1 | *APC* | *ARAF* | 23 | *DVL2* | *DVL3* | 6 |
| *NOTCH2* | *FZD3* | 1 | *CCND1* | *PIK3CA* | 1 | *APC* | *FZD3* | 4 | *DVL2* | *POLK* | 2 |
| *NOTCH2* | *NOTCH1* | 1 | *CCND1* | *DVL3* | 2 | *APC* | *FZD6* | 3 | *DVL2* | *BRAF* | 15 |
| *NOTCH2* | *HRAS* | 1 | *CCND1* | *POLK* | 20 | *APC* | *NOTCH1* | 1 | *DVL2* | *FZD3* | 18 |
| *NOTCH2* | *DDB2* | 1 | *CCND1* | *BAK1* | 1 | *APC* | *DDB2* | 8 | *DVL2* | *FZD6* | 20 |
| *NOTCH2* | *IGF1* | 2 | *CCND1* | *BRAF* | 2 | *APC* | *RPS6KB2* | 3 | *DVL2* | *NOTCH1* | 3 |
| *NOTCH2* | *BRCA2* | 1 | *CCND1* | *FZD3* | 2 | *APC* | *PTEN* | 6 | *DVL2* | *HRAS* | 9 |
| *NOTCH2* | *AKT1* | 1 | *CCND1* | *FZD6* | 1 | *APC* | *CDK4* | 4 | *DVL2* | *IGF1* | 2 |
| *NOTCH2* | *MAP2K1* | 1 | *CCND1* | *HRAS* | 2 | *APC* | *BRCA2* | 9 | *DVL2* | *BRCA2* | 7 |
| *NOTCH2* | *DVL2* | 1 | *CCND1* | *IGF1* | 3 | *APC* | *RB1* | 1 | *DVL2* | *AKT1* | 1 |
| *NOTCH2* | *RPS6KB1* | 2 | *CCND1* | *BRCA2* | 5 | *APC* | *AKT1* | 1 | *DVL2* | *MAP2K1* | 2 |
| *NOTCH2* | *MAP2K2* | 2 | *CCND1* | *DVL2* | 1 | *APC* | *DVL2* | 1 | *DVL2* | *RPS6KB1* | 5 |
| *NOTCH2* | *MAPK1* | 3 | *CCND1* | *RPS6KB1* | 4 | *APC* | *RPS6KB1* | 3 | *TP53* | *DVL1* | 1 |
| *SHC1* | *MTOR* | 3 | *CCND1* | *MAP2K2* | 4 | *APC* | *MAP2K2* | 5 | *TP53* | *AKT3* | 1 |
| *SHC1* | *PIK3R3* | 2 | *CCND1* | *AKT2* | 2 | *APC* | *AKT2* | 2 | *TP53* | *NCOA1* | 1 |
| *SHC1* | *WNT10A* | 3 | *CCND1* | *MAPK1* | 3 | *APC* | *BAX* | 2 | *TP53* | *PIK3CB* | 3 |
| *SHC1* | *PIK3CA* | 1 | *PTEN* | *MTOR* | 2 | *APC* | *MAPK1* | 21 | *TP53* | *PIK3CA* | 1 |
| *SHC1* | *DVL3* | 2 | *PTEN* | *AKT3* | 1 | *TCF7* | *DVL1* | 1 | *TP53* | *FZD6* | 1 |
| *SHC1* | *POLK* | 16 | *PTEN* | *WNT10A* | 1 | *TCF7* | *AKT3* | 1 | *TP53* | *DDB2* | 1 |
| *SHC1* | *APC* | 1 | *PTEN* | *RAF1* | 1 | *TCF7* | *WNT10A* | 2 | *TP53* | *BRCA2* | 1 |
| *SHC1* | *BAK1* | 4 | *PTEN* | *PIK3CB* | 3 | *TCF7* | *PIK3CA* | 1 | *TP53* | *DVL2* | 2 |
| *SHC1* | *CDK6* | 1 | *PTEN* | *DVL3* | 1 | *TCF7* | *LEF1* | 1 | *TP53* | *MAP2K2* | 1 |
| *SHC1* | *BRAF* | 2 | *PTEN* | *POLK* | 1 | *TCF7* | *E2F3* | 1 | *RPS6KB1* | *DVL1* | 3 |
| *SHC1* | *FZD6* | 3 | *PTEN* | *ARAF* | 1 | *TCF7* | *CDK6* | 1 | *RPS6KB1* | *MTOR* | 1 |
| *SHC1* | *NOTCH1* | 1 | *PTEN* | *IGF1* | 1 | *TCF7* | *BRAF* | 1 | *RPS6KB1* | *PIK3R3* | 1 |
| *SHC1* | *HRAS* | 1 | *PTEN* | *BRCA2* | 1 | *TCF7* | *NOTCH1* | 6 | *RPS6KB1* | *GADD45A* | 1 |
| *SHC1* | *RPS6KB2* | 3 | *PTEN* | *MAP2K1* | 1 | *TCF7* | *IGF1* | 1 | *RPS6KB1* | *AKT3* | 2 |
| *SHC1* | *CDK4* | 1 | *PTEN* | *MAPK1* | 2 | *TCF7* | *BRCA2* | 1 | *RPS6KB1* | *PIK3CA* | 3 |
| *SHC1* | *IGF1* | 3 | *NFKB2* | *DVL1* | 3 | *TCF7* | *ESR2* | 2 | *RPS6KB1* | *DVL3* | 5 |
| *SHC1* | *BRCA2* | 3 | *NFKB2* | *NRAS* | 1 | *TCF7* | *MAP2K1* | 1 | *RPS6KB1* | *POLK* | 1 |
| *SHC1* | *DVL2* | 1 | *NFKB2* | *NCOA1* | 2 | *TCF7* | *DVL2* | 1 | *RPS6KB1* | *BRAF* | 2 |
| *SHC1* | *GADD45B* | 2 | *NFKB2* | *RAF1* | 4 | *TCF7* | *MAP2K2* | 1 | *RPS6KB1* | *FZD3* | 3 |
| *SHC1* | *MAP2K2* | 4 | *NFKB2* | *CTNNB1* | 1 | *E2F3* | *DVL1* | 20 | *RPS6KB1* | *FZD6* | 5 |
| *SHC1* | *AKT2* | 1 | *NFKB2* | *GSK3B* | 5 | *E2F3* | *MTOR* | 4 | *RPS6KB1* | *HRAS* | 5 |
| *AKT3* | *MTOR* | 3 | *NFKB2* | *PIK3CA* | 1 | *E2F3* | *PIK3R3* | 2 | *RPS6KB1* | *RPS6KB2* | 1 |
| *AKT3* | *PIK3R3* | 4 | *NFKB2* | *DVL3* | 5 | *E2F3* | *GADD45A* | 3 | *RPS6KB1* | *IGF1* | 2 |
| *AKT3* | *GADD45A* | 4 | *NFKB2* | *PIK3R1* | 2 | *E2F3* | *AKT3* | 2 | *RPS6KB1* | *BRCA2* | 3 |
| *AKT3* | *SOS1* | 1 | *NFKB2* | *POLK* | 13 | *E2F3* | *NCOA1* | 16 | *RPS6KB1* | *MAP2K1* | 1 |
| *AKT3* | *WNT10A* | 4 | *NFKB2* | *APC* | 1 | *E2F3* | *WNT10A* | 18 | *RPS6KB1* | *DVL2* | 6 |
| *AKT3* | *RAF1* | 1 | *NFKB2* | *CSNK1A1* | 16 | *E2F3* | *PIK3CA* | 18 | *GRB2* | *PIK3CB* | 29 |
| *AKT3* | *PIK3CA* | 1 | *NFKB2* | *E2F3* | 2 | *E2F3* | *DVL3* | 14 | *GRB2* | *CSNK1A1* | 28 |
| *AKT3* | *DVL3* | 6 | *NFKB2* | *BAK1* | 7 | *E2F3* | *LEF1* | 4 | *GRB2* | *ARAF* | 30 |
| *AKT3* | *POLK* | 3 | *NFKB2* | *CDKN1A* | 1 | *E2F3* | *POLK* | 2 | *GRB2* | *NCOA3* | 19 |
| *AKT3* | *FZD3* | 2 | *NFKB2* | *ESR1* | 2 | *E2F3* | *TCF7* | 1 | *GRB2* | *MAPK1* | 13 |
| *AKT3* | *FZD6* | 1 | *NFKB2* | *ARAF* | 5 | *E2F3* | *BAK1* | 1 | *NCOA3* | *PIK3CB* | 10 |
| *AKT3* | *HRAS* | 6 | *NFKB2* | *FZD3* | 3 | *E2F3* | *CDKN1A* | 1 | *NCOA3* | *CSNK1A1* | 18 |
| *AKT3* | *IGF1* | 2 | *NFKB2* | *FZD6* | 3 | *E2F3* | *ESR1* | 16 | *NCOA3* | *ARAF* | 12 |
| *AKT3* | *BRCA2* | 3 | *NFKB2* | *DDB2* | 1 | *E2F3* | *CDK6* | 1 | *NCOA3* | *GRB2* | 25 |
| *AKT3* | *MAP2K1* | 1 | *NFKB2* | *RPS6KB2* | 4 | *E2F3* | *BRAF* | 15 | *NCOA3* | *MAPK1* | 8 |
| *AKT3* | *DVL2* | 3 | *NFKB2* | *PTEN* | 2 | *E2F3* | *FZD3* | 26 | *GADD45B* | *DVL1* | 1 |
| *AKT3* | *RPS6KB1* | 1 | *NFKB2* | *KRAS* | 2 | *E2F3* | *FZD6* | 22 | *GADD45B* | *PIK3CD* | 1 |
| *AKT3* | *MAP2K2* | 3 | *NFKB2* | *CDK4* | 12 | *E2F3* | *HRAS* | 15 | *GADD45B* | *PIK3R3* | 1 |
| *NCOA1* | *DVL1* | 2 | *NFKB2* | *BRCA2* | 1 | *E2F3* | *RPS6KB2* | 1 | *GADD45B* | *AKT3* | 3 |
| *NCOA1* | *MTOR* | 1 | *NFKB2* | *RB1* | 7 | *E2F3* | *SP1* | 1 | *GADD45B* | *PIK3CA* | 1 |
| *NCOA1* | *PIK3R3* | 3 | *NFKB2* | *ESR2* | 5 | *E2F3* | *IGF1* | 3 | *GADD45B* | *DVL3* | 1 |
| *NCOA1* | *JUN* | 1 | *NFKB2* | *DVL2* | 4 | *E2F3* | *BRCA2* | 21 | *GADD45B* | *CDK6* | 7 |
| *NCOA1* | *GADD45A* | 2 | *NFKB2* | *TP53* | 2 | *E2F3* | *ESR2* | 25 | *GADD45B* | *BRAF* | 1 |
| *NCOA1* | *AKT3* | 2 | *NFKB2* | *RPS6KB1* | 1 | *E2F3* | *FOS* | 3 | *GADD45B* | *FZD6* | 1 |
| *NCOA1* | *WNT10A* | 1 | *NFKB2* | *GRB2* | 3 | *E2F3* | *MAP2K1* | 2 | *GADD45B* | *NOTCH1* | 2 |
| *NCOA1* | *PIK3CA* | 1 | *NFKB2* | *NCOA3* | 25 | *E2F3* | *DVL2* | 26 | *GADD45B* | *HRAS* | 1 |
| *NCOA1* | *DVL3* | 1 | *NFKB2* | *GADD45B* | 7 | *E2F3* | *RPS6KB1* | 13 | *GADD45B* | *BRCA2* | 1 |
| *NCOA1* | *LEF1* | 2 | *NFKB2* | *MAP2K2* | 1 | *BAK1* | *MAPK1* | 1 | *GADD45B* | *DVL2* | 1 |
| *NCOA1* | *POLK* | 2 | *NFKB2* | *BAX* | 10 | *CDKN1A* | *DVL1* | 9 | *GADD45B* | *RPS6KB1* | 1 |
| *NCOA1* | *E2F3* | 3 | *NFKB2* | *MAPK1* | 3 | *CDKN1A* | *MTOR* | 1 | *GADD45B* | *MAP2K2* | 1 |
| *NCOA1* | *ESR1* | 1 | *KRAS* | *DVL1* | 1 | *CDKN1A* | *SHC1* | 1 | *MAP2K2* | *MTOR* | 1 |
| *NCOA1* | *BRAF* | 4 | *SP1* | *MTOR* | 23 | *CDKN1A* | *AKT3* | 1 | *MAP2K2* | *PIK3R3* | 1 |
| *NCOA1* | *FZD3* | 5 | *SP1* | *PIK3R3* | 16 | *CDKN1A* | *SOS1* | 1 | *MAP2K2* | *GADD45A* | 2 |
| *NCOA1* | *FZD6* | 9 | *SP1* | *GADD45A* | 13 | *CDKN1A* | *WNT10A* | 3 | *MAP2K2* | *AKT3* | 1 |
| *NCOA1* | *HRAS* | 2 | *SP1* | *NOTCH2* | 12 | *CDKN1A* | *RAF1* | 10 | *MAP2K2* | *WNT10A* | 1 |
| *NCOA1* | *SP1* | 1 | *SP1* | *SHC1* | 5 | *CDKN1A* | *PIK3CA* | 10 | *MAP2K2* | *RAF1* | 1 |
| *NCOA1* | *IGF1* | 1 | *SP1* | *AKT3* | 17 | *CDKN1A* | *DVL3* | 2 | *MAP2K2* | *POLK* | 3 |
| *NCOA1* | *BRCA2* | 1 | *SP1* | *NCOA1* | 23 | *CDKN1A* | *PIK3R1* | 1 | *MAP2K2* | *FZD3* | 2 |
| *NCOA1* | *ESR2* | 7 | *SP1* | *SOS1* | 7 | *CDKN1A* | *POLK* | 3 | *MAP2K2* | *FZD6* | 1 |
| *NCOA1* | *FOS* | 1 | *SP1* | *WNT10A* | 16 | *CDKN1A* | *APC* | 2 | *MAP2K2* | *NOTCH1* | 1 |
| *NCOA1* | *DVL2* | 7 | *SP1* | *RAF1* | 6 | *CDKN1A* | *BAK1* | 1 | *MAP2K2* | *HRAS* | 2 |
| *NCOA1* | *RPS6KB1* | 2 | *SP1* | *CTNNB1* | 1 | *CDKN1A* | *CDK6* | 2 | *MAP2K2* | *BRCA2* | 4 |
| *SOS1* | *DVL1* | 2 | *SP1* | *PIK3CB* | 1 | *CDKN1A* | *BRAF* | 1 | *MAP2K2* | *DVL2* | 2 |
| *SOS1* | *MTOR* | 2 | *SP1* | *DVL3* | 14 | *CDKN1A* | *FZD3* | 3 | *AKT2* | *DVL1* | 1 |
| *SOS1* | *SHC1* | 2 | *SP1* | *POLK* | 20 | *CDKN1A* | *FZD6* | 3 | *AKT2* | *AKT3* | 1 |
| *SOS1* | *AKT3* | 1 | *SP1* | *APC* | 9 | *CDKN1A* | *HRAS* | 1 | *AKT2* | *PIK3CA* | 2 |
| *SOS1* | *RAF1* | 1 | *SP1* | *E2F3* | 5 | *CDKN1A* | *DDB2* | 1 | *AKT2* | *DVL3* | 2 |
| *SOS1* | *PIK3CB* | 1 | *SP1* | *BAK1* | 4 | *CDKN1A* | *PTEN* | 1 | *AKT2* | *POLK* | 3 |
| *SOS1* | *POLK* | 12 | *SP1* | *CDKN1A* | 1 | *CDKN1A* | *KRAS* | 1 | *AKT2* | *APC* | 1 |
| *SOS1* | *APC* | 2 | *SP1* | *CDK6* | 6 | *CDKN1A* | *BRCA2* | 1 | *AKT2* | *BAK1* | 3 |
| *SOS1* | *BAK1* | 3 | *SP1* | *BRAF* | 5 | *CDKN1A* | *DVL2* | 6 | *AKT2* | *RPS6KB2* | 1 |
| *SOS1* | *CDK6* | 2 | *SP1* | *ARAF* | 1 | *CDKN1A* | *RPS6KB1* | 2 | *AKT2* | *PTEN* | 1 |
| *SOS1* | *FZD3* | 2 | *SP1* | *FZD6* | 7 | *CDKN1A* | *MAP2K2* | 4 | *AKT2* | *IGF1* | 1 |
| *SOS1* | *NOTCH1* | 1 | *SP1* | *NOTCH1* | 9 | *CDKN1A* | *MAPK1* | 1 | *AKT2* | *BRCA2* | 2 |
| *SOS1* | *HRAS* | 2 | *SP1* | *HRAS* | 15 | *ESR1* | *DVL1* | 30 | *AKT2* | *AKT1* | 1 |
| *SOS1* | *DDB2* | 5 | *SP1* | *DDB2* | 10 | *ESR1* | *MTOR* | 5 | *AKT2* | *DVL2* | 1 |
| *SOS1* | *RPS6KB2* | 1 | *SP1* | *CCND1* | 2 | *ESR1* | *NCOA1* | 6 | *AKT2* | *MAPK1* | 4 |
| *MAPK1* | *DVL2* | 1 | *MAPK1* | *HRAS* | 1 | *ESR1* | *WNT10A* | 6 | *MAPK1* | *AKT3* | 1 |

**Supplementary Table S5.** Gene regulatory networks in breast cancer cells.

| **Source** | **Target** | **Wei**  **ght** | **Source** | **Target** | **Wei**  **ght** | **Source** | **Target** | **Wei**  **ght** | **Source** | **Target** | **Wei**  **ght** |
| --- | --- | --- | --- | --- | --- | --- | --- | --- | --- | --- | --- |
| *DVL1* | *FZD7* | 1 | *HRAS* | *BAK1* | 30 | *E2F3* | *SHC1* | 28 | *MAPK3* | *SHC1* | 2 |
| *DVL1* | *PIK3R1* | 19 | *HRAS* | *DDB2* | 17 | *E2F3* | *SOS1* | 3 | *MAPK3* | *SOS1* | 30 |
| *MTOR* | *SHC1* | 9 | *HRAS* | *MAP2K1* | 29 | *E2F3* | *BAK1* | 3 | *MAPK3* | *FZD7* | 7 |
| *MTOR* | *RAF1* | 28 | *HRAS* | *MAPK3* | 30 | *E2F3* | *CDKN1A* | 30 | *MAPK3* | *RAF1* | 30 |
| *MTOR* | *ARAF* | 17 | *HRAS* | *RPS6KB1* | 29 | *E2F3* | *EGFR* | 30 | *MAPK3* | *BAK1* | 30 |
| *MTOR* | *RPS6KB2* | 28 | *HRAS* | *MAP2K2* | 5 | *E2F3* | *HRAS* | 6 | *MAPK3* | *ARAF* | 2 |
| *MTOR* | *KRAS* | 29 | *DDB2* | *SHC1* | 20 | *E2F3* | *DDB2* | 4 | *MAPK3* | *HRAS* | 30 |
| *MTOR* | *AKT2* | 29 | *DDB2* | *SOS1* | 30 | *E2F3* | *RPS6KB2* | 9 | *MAPK3* | *DDB2* | 14 |
| *PIK3R3* | *SHC1* | 25 | *DDB2* | *BAK1* | 10 | *E2F3* | *SP1* | 1 | *MAPK3* | *RPS6KB2* | 30 |
| *PIK3R3* | *MAPK3* | 1 | *DDB2* | *HRAS* | 30 | *E2F3* | *MAPK3* | 25 | *MAPK3* | *KRAS* | 30 |
| *JUN* | *PIK3R1* | 15 | *DDB2* | *MAPK3* | 30 | *E2F3* | *AKT2* | 1 | *MAPK3* | *MAP2K1* | 30 |
| *GADD45A* | *EGFR* | 6 | *DDB2* | *RPS6KB1* | 4 | *E2F3* | *MAPK1* | 5 | *MAPK3* | *RPS6KB1* | 30 |
| *GADD45A* | *MAP2K1* | 5 | *RPS6KB2* | *GADD45A* | 6 | *BAK1* | *SHC1* | 23 | *MAPK3* | *MAP2K2* | 27 |
| *NOTCH2* | *SHC1* | 6 | *RPS6KB2* | *SHC1* | 30 | *BAK1* | *SOS1* | 30 | *MAPK3* | *AKT2* | 30 |
| *NOTCH2* | *CDKN1A* | 30 | *RPS6KB2* | *SOS1* | 29 | *BAK1* | *HRAS* | 30 | *MAPK3* | *MAPK1* | 8 |
| *NOTCH2* | *DDB2* | 1 | *RPS6KB2* | *RAF1* | 23 | *BAK1* | *DDB2* | 20 | *RPS6KB1* | *SHC1* | 30 |
| *NOTCH2* | *RPS6KB2* | 1 | *RPS6KB2* | *CSNK1A1* | 1 | *BAK1* | *MAP2K1* | 30 | *RPS6KB1* | *SOS1* | 30 |
| *NOTCH2* | *KRAS* | 5 | *RPS6KB2* | *BAK1* | 28 | *BAK1* | *MAPK3* | 26 | *RPS6KB1* | *FZD7* | 1 |
| *SHC1* | *GADD45A* | 2 | *RPS6KB2* | *CDKN1A* | 1 | *BAK1* | *RPS6KB1* | 4 | *RPS6KB1* | *BAK1* | 30 |
| *SHC1* | *SOS1* | 30 | *RPS6KB2* | *EGFR* | 2 | *BAK1* | *MAP2K2* | 2 | *RPS6KB1* | *HRAS* | 30 |
| *SHC1* | *RAF1* | 30 | *RPS6KB2* | *ARAF* | 1 | *CDKN1A* | *SHC1* | 30 | *RPS6KB1* | *DDB2* | 6 |
| *SHC1* | *BAK1* | 30 | *RPS6KB2* | *HRAS* | 30 | *CDKN1A* | *SOS1* | 30 | *RPS6KB1* | *MAP2K1* | 28 |
| *SHC1* | *HRAS* | 30 | *RPS6KB2* | *DDB2* | 29 | *CDKN1A* | *RAF1* | 2 | *RPS6KB1* | *MAPK3* | 29 |
| *SHC1* | *DDB2* | 29 | *RPS6KB2* | *KRAS* | 28 | *CDKN1A* | *PIK3R1* | 9 | *RPS6KB1* | *MAP2K2* | 8 |
| *SHC1* | *RPS6KB2* | 30 | *RPS6KB2* | *MAP2K1* | 1 | *CDKN1A* | *BAK1* | 30 | *GRB2* | *SHC1* | 30 |
| *SHC1* | *KRAS* | 30 | *RPS6KB2* | *MAPK3* | 30 | *CDKN1A* | *HRAS* | 30 | *GRB2* | *SOS1* | 30 |
| *SHC1* | *MAP2K1* | 28 | *RPS6KB2* | *RPS6KB1* | 22 | *CDKN1A* | *DDB2* | 4 | *GRB2* | *BAK1* | 10 |
| *SHC1* | *MAPK3* | 30 | *RPS6KB2* | *MAP2K2* | 24 | *CDKN1A* | *RPS6KB2* | 30 | *GRB2* | *HRAS* | 29 |
| *SHC1* | *RPS6KB1* | 27 | *RPS6KB2* | *AKT2* | 30 | *CDKN1A* | *KRAS* | 30 | *GRB2* | *MAPK3* | 30 |
| *SHC1* | *MAP2K2* | 30 | *RPS6KB2* | *MAPK1* | 30 | *CDKN1A* | *MAP2K1* | 29 | *MAP2K2* | *SHC1* | 25 |
| *SHC1* | *AKT2* | 30 | *NFKB2* | *GADD45A* | 23 | *CDKN1A* | *MAPK3* | 30 | *MAP2K2* | *SOS1* | 30 |
| *SHC1* | *MAPK1* | 30 | *NFKB2* | *SHC1* | 30 | *CDKN1A* | *RPS6KB1* | 1 | *MAP2K2* | *RAF1* | 1 |
| *NCOA1* | *SOS1* | 14 | *NFKB2* | *SOS1* | 30 | *CDKN1A* | *MAP2K2* | 30 | *MAP2K2* | *BAK1* | 30 |
| *NCOA1* | *RAF1* | 25 | *NFKB2* | *FZD7* | 25 | *CDKN1A* | *AKT2* | 9 | *MAP2K2* | *HRAS* | 23 |
| *NCOA1* | *CDKN1A* | 30 | *NFKB2* | *RAF1* | 27 | *ARAF* | *SHC1* | 8 | *MAP2K2* | *DDB2* | 29 |
| *NCOA1* | *ARAF* | 24 | *NFKB2* | *E2F3* | 1 | *ARAF* | *SOS1* | 26 | *MAP2K2* | *RPS6KB2* | 11 |
| *NCOA1* | *HRAS* | 28 | *NFKB2* | *BAK1* | 4 | *ARAF* | *HRAS* | 25 | *MAP2K2* | *KRAS* | 12 |
| *NCOA1* | *DDB2* | 30 | *NFKB2* | *CDKN1A* | 26 | *ARAF* | *RPS6KB2* | 2 | *MAP2K2* | *MAP2K1* | 30 |
| *NCOA1* | *RPS6KB2* | 30 | *NFKB2* | *ARAF* | 13 | *ARAF* | *KRAS* | 1 | *MAP2K2* | *MAPK3* | 8 |
| *NCOA1* | *NFKB2* | 1 | *NFKB2* | *HRAS* | 30 | *ARAF* | *MAPK3* | 30 | *MAP2K2* | *RPS6KB1* | 28 |
| *NCOA1* | *KRAS* | 30 | *NFKB2* | *DDB2* | 26 | *ARAF* | *RPS6KB1* | 30 | *MAP2K2* | *AKT2* | 3 |
| *NCOA1* | *SP1* | 1 | *NFKB2* | *RPS6KB2* | 30 | *FZD6* | *SHC1* | 30 | *AKT2* | *GADD45A* | 2 |
| *NCOA1* | *MAPK3* | 19 | *NFKB2* | *KRAS* | 30 | *FZD6* | *EGFR* | 14 | *AKT2* | *SHC1* | 30 |
| *NCOA1* | *MAP2K2* | 3 | *NFKB2* | *SP1* | 29 | *FZD6* | *ARAF* | 1 | *AKT2* | *SOS1* | 28 |
| *NCOA1* | *AKT2* | 30 | *NFKB2* | *MAP2K1* | 11 | *FZD6* | *MAPK3* | 1 | *AKT2* | *RAF1* | 5 |
| *SOS1* | *SHC1* | 30 | *NFKB2* | *MAPK3* | 30 | *MYC* | *GADD45A* | 30 | *AKT2* | *BAK1* | 30 |
| *SOS1* | *FZD7* | 1 | *NFKB2* | *RPS6KB1* | 18 | *MYC* | *SHC1* | 21 | *AKT2* | *HRAS* | 29 |
| *SOS1* | *BAK1* | 30 | *NFKB2* | *MAP2K2* | 1 | *MYC* | *BAK1* | 1 | *AKT2* | *DDB2* | 27 |
| *SOS1* | *ARAF* | 1 | *NFKB2* | *AKT2* | 30 | *MYC* | *CDKN1A* | 18 | *AKT2* | *RPS6KB2* | 27 |
| *SOS1* | *HRAS* | 29 | *NFKB2* | *MAPK1* | 18 | *MYC* | *NOTCH1* | 30 | *AKT2* | *KRAS* | 25 |
| *SOS1* | *DDB2* | 12 | *TCF7L2* | *SHC1* | 3 | *MYC* | *HRAS* | 3 | *AKT2* | *MAP2K1* | 1 |
| *SOS1* | *MAP2K1* | 28 | *TCF7L2* | *SOS1* | 1 | *MYC* | *RPS6KB2* | 6 | *AKT2* | *MAPK3* | 30 |
| *SOS1* | *MAPK3* | 30 | *TCF7L2* | *HRAS* | 1 | *MYC* | *NFKB2* | 26 | *AKT2* | *RPS6KB1* | 24 |
| *SOS1* | *RPS6KB1* | 30 | *KRAS* | *GADD45A* | 3 | *MYC* | *KRAS* | 5 | *AKT2* | *MAP2K2* | 23 |
| *SOS1* | *MAP2K2* | 4 | *KRAS* | *SHC1* | 30 | *MYC* | *SP1* | 30 | *AKT2* | *MAPK1* | 24 |
| *FZD7* | *SHC1* | 17 | *KRAS* | *SOS1* | 30 | *MYC* | *MAPK3* | 30 | *MAPK1* | *SHC1* | 30 |
| *FZD7* | *RAF1* | 27 | *KRAS* | *RAF1* | 18 | *MYC* | *AKT2* | 10 | *MAPK1* | *SOS1* | 30 |
| *FZD7* | *CSNK1A1* | 2 | *KRAS* | *CSNK1A1* | 2 | *MYC* | *MAPK1* | 24 | *MAPK1* | *RAF1* | 30 |
| *FZD7* | *ARAF* | 18 | *KRAS* | *BAK1* | 30 | *NOTCH1* | *SHC1* | 28 | *MAPK1* | *PIK3R1* | 16 |
| *FZD7* | *HRAS* | 1 | *KRAS* | *ARAF* | 5 | *NOTCH1* | *MAPK3* | 1 | *MAPK1* | *BAK1* | 16 |
| *FZD7* | *RPS6KB2* | 29 | *KRAS* | *HRAS* | 30 | *NOTCH1* | *MAPK1* | 1 | *MAPK1* | *CDKN1A* | 28 |
| *FZD7* | *KRAS* | 30 | *KRAS* | *DDB2* | 29 | *HRAS* | *SHC1* | 30 | *MAPK1* | *ARAF* | 30 |
| *FZD7* | *AKT2* | 26 | *KRAS* | *RPS6KB2* | 29 | *HRAS* | *SOS1* | 30 | *MAPK1* | *HRAS* | 30 |
| *RAF1* | *SHC1* | 30 | *KRAS* | *MAP2K1* | 1 | *HRAS* | *FZD7* | 1 | *MAPK1* | *DDB2* | 30 |
| *RAF1* | *SOS1* | 30 | *KRAS* | *MAPK3* | 30 | *MAPK1* | *MAPK3* | 30 | *MAPK1* | *RPS6KB2* | 30 |
| *RAF1* | *BAK1* | 30 | *KRAS* | *RPS6KB1* | 29 | *MAPK1* | *RPS6KB1* | 30 | *MAPK1* | *KRAS* | 30 |
| *RAF1* | *ARAF* | 2 | *KRAS* | *MAP2K2* | 27 | *MAPK1* | *MAP2K2* | 30 | *MAPK1* | *IGF1R* | 5 |
| *RAF1* | *HRAS* | 30 | *KRAS* | *AKT2* | 30 | *MAPK1* | *AKT2* | 30 | *SP1* | *AKT2* | 30 |
| *RAF1* | *DDB2* | 4 | *KRAS* | *MAPK1* | 30 | *HES1* | *NFKB2* | 22 | *SP1* | *MAPK1* | 28 |
| *RAF1* | *MAP2K1* | 5 | *SP1* | *SHC1* | 25 | *HES1* | *KRAS* | 30 | *CDK4* | *GADD45A* | 1 |
| *RAF1* | *MAPK3* | 30 | *SP1* | *SOS1* | 30 | *HES1* | *SP1* | 4 | *CDK4* | *SHC1* | 4 |
| *RAF1* | *RPS6KB1* | 29 | *SP1* | *FZD7* | 24 | *HES1* | *MAPK3* | 1 | *CDK4* | *MAPK3* | 12 |
| *RAF1* | *MAP2K2* | 2 | *SP1* | *RAF1* | 30 | *HES1* | *MAP2K2* | 3 | *RB1* | *NOTCH3* | 30 |
| *CTNNB1* | *GADD45A* | 1 | *SP1* | *E2F3* | 14 | *HES1* | *AKT2* | 30 | *FOS* | *CCND1* | 4 |
| *CTNNB1* | *SHC1* | 29 | *SP1* | *BAK1* | 30 | *PIK3R1* | *SHC1* | 2 | *FOS* | *NOTCH3* | 30 |
| *CTNNB1* | *MAPK3* | 27 | *SP1* | *CDKN1A* | 1 | *PIK3R1* | *SOS1* | 9 | *AKT1* | *NOTCH3* | 3 |
| *DVL3* | *HRAS* | 1 | *SP1* | *EGFR* | 3 | *PIK3R1* | *FGFR1* | 3 | *MAP2K1* | *SHC1* | 1 |
| *HES1* | *SHC1* | 29 | *SP1* | *HRAS* | 30 | *PIK3R1* | *HRAS* | 14 | *MAP2K1* | *SOS1* | 30 |
| *HES1* | *NCOA1* | 9 | *SP1* | *DDB2* | 30 | *PIK3R1* | *DDB2* | 1 | *MAP2K1* | *BAK1* | 1 |
| *HES1* | *RAF1* | 3 | *SP1* | *RPS6KB2* | 27 | *PIK3R1* | *IGF1R* | 1 | *MAP2K1* | *HRAS* | 30 |
| *HES1* | *CSNK1A1* | 24 | *SP1* | *NFKB2* | 30 | *PIK3R1* | *MAPK3* | 27 | *MAP2K1* | *DDB2* | 1 |
| *HES1* | *CDKN1A* | 30 | *SP1* | *KRAS* | 30 | *PIK3R1* | *RPS6KB1* | 5 | *MAP2K1* | *MAPK3* | 12 |
| *HES1* | *EGFR* | 1 | *SP1* | *MAP2K1* | 30 | *PIK3R1* | *MAP2K2* | 23 | *IGF1R* | *SOS1* | 1 |
| *HES1* | *ARAF* | 1 | *SP1* | *MAPK3* | 30 | *CSNK1A1* | *SHC1* | 1 | *IGF1R* | *HRAS* | 20 |
| *HES1* | *NOTCH1* | 1 | *SP1* | *RPS6KB1* | 30 | *CSNK1A1* | *MAPK3* | 8 | *IGF1R* | *MAPK3* | 12 |
| *HES1* | *DDB2* | 20 | *SP1* | *MAP2K2* | 30 | *E2F3* | *GADD45A* | 27 | *MAPK3* | *GADD45A* | 1 |
| *HES1* | *RPS6KB2* | 30 |  |  |  |  |  |  |  |  |  |

**Supplementary Table S6.** Var-Score of genes within cell-specific regulatory networks.

| **Gene symbol** | **T cell** | **B cell** | **Cancer cell** | **Gene symbol** | **T cell** | **B cell** | **Cancer cell** |
| --- | --- | --- | --- | --- | --- | --- | --- |
| *SP1* | 27 | 37 | 25 | *TP53* | 26 | 10 | 4 |
| *MAP2K1* | 25 | 30 | 21 | *LEF1* | 20 | 10 | 4 |
| *NFKB2* | 11 | 36 | 20 | *NOTCH1* | 6 | 8 | 4 |
| *RPS6KB2* | 39 | 18 | 19 | *CTNNB1* | 0 | 7 | 3 |
| *AKT2* | 17 | 17 | 18 | *CDK4* | 1 | 1 | 3 |
| *E2F3* | 19 | 30 | 17 | *IGF1R* | 0 | 0 | 3 |
| *SHC1* | 15 | 22 | 16 | *TCF7L2* | 0 | 0 | 3 |
| *KRAS* | 39 | 17 | 16 | *PIK3R3* | 0 | 18 | 2 |
| *MAPK1* | 11 | 6 | 16 | *DVL1* | 0 | 17 | 2 |
| *MAPK3* | 13 | 3 | 16 | *PIK3CB* | 15 | 3 | 2 |
| *HES1* | 0 | 0 | 16 | *FOS* | 6 | 0 | 2 |
| *JUN* | 27 | 31 | 15 | *CSNK1A1* | 5 | 0 | 2 |
| *NCOA1* | 12 | 26 | 15 | *GADD45B* | 5 | 15 | 1 |
| *NOTCH2* | 26 | 24 | 15 | *TCF7* | 1 | 15 | 1 |
| *CDKN1A* | 10 | 26 | 14 | *PTEN* | 6 | 12 | 1 |
| *SOS1* | 16 | 25 | 14 | *POLK* | 6 | 5 | 1 |
| *HRAS* | 17 | 22 | 14 | *GSK3B* | 9 | 2 | 1 |
| *MYC* | 51 | 15 | 13 | *RB1* | 10 | 0 | 1 |
| *MAP2K2* | 13 | 14 | 13 | *ESR2* | 0 | 27 | 0 |
| *RPS6KB1* | 16 | 20 | 12 | *WNT10A* | 0 | 25 | 0 |
| *RAF1* | 12 | 11 | 12 | *ESR1* | 0 | 23 | 0 |
| *APC* | 17 | 28 | 9 | *CCND1* | 0 | 19 | 0 |
| *BAK1* | 25 | 6 | 9 | *IGF1* | 0 | 17 | 0 |
| *PIK3R1* | 5 | 2 | 9 | *FZD3* | 0 | 16 | 0 |
| *BRAF* | 40 | 15 | 8 | *BRCA2* | 0 | 14 | 0 |
| *FZD7* | 0 | 0 | 8 | *PIK3CA* | 0 | 14 | 0 |
| *AKT3* | 18 | 18 | 7 | *NCOA3* | 2 | 5 | 0 |
| *DVL3* | 22 | 15 | 7 | *NRAS* | 14 | 3 | 0 |
| *MTOR* | 4 | 15 | 7 | *PIK3CD* | 13 | 0 | 0 |
| *AKT1* | 23 | 11 | 7 | *GADD45G* | 6 | 0 | 0 |
| *ARAF* | 20 | 5 | 7 | *BAX* | 0 | 0 | 0 |
| *DVL2* | 16 | 18 | 6 | *LRP6* | 0 | 0 | 0 |
| *DDB2* | 4 | 9 | 6 | *TCF7L1* | 0 | 0 | 0 |
| *CDK6* | 32 | 10 | 5 | *ERBB2* | 0 | 0 | 0 |
| *GRB2* | 1 | 5 | 5 | *EGFR* | 0 | 0 | 0 |
| *GADD45A* | 5 | 25 | 4 | *NOTCH3* | 0 | 0 | 0 |
| *FZD6* | 1 | 13 | 4 | *LRP5* | 0 | 0 | 0 |
| *FGFR1* | 0 | 0 | 0 |  |  |  |  |

**Supplementary Table S7.** Gene regulatory network inference tools from transcriptomic data.

| **Tool** | **Type of modeling** | **Type of data** | **Time-course?** | **Language** | **Version** | **Extended**  **version** |
| --- | --- | --- | --- | --- | --- | --- |
| ARACNE | Information Theory | Bulk RNA-seq | False | R | v 3.30.0 | - |
| CLR | Information Theory | Bulk RNA-seq | False | R | v 3.30.0 | - |
| DeepSEM | Deep generative model | scRNA-seq | False | Python | v 1.01 | - |
| GENIE3 | Tree-based | Bulk RNA-seq | False | R | v 1.1.2 | dynGENIE3  (Time series) |
| GRISLI | Differential equations | scRNA-seq | True | Matlab | - | - |
| LEAP | Co-expression | scRNA-seq | False | R | v 0.2 | - |
| PIDC | Information Theory | scRNA-seq | False | Julia | v 0.1.0 | - |
| SCENIC | Tree-based | scRNA-seq | False | R/Python | v 1.2.0 | SCENIC+ (Multi-omics) |
| SCODE | Differential equations | scRNA-seq | True | R/Julia | - | - |
| SINCERITIES | Regression | scRNA-seq | True | R | v 2.0 | - |
| Tigress | Regression | Bulk RNA-seq | False | R | - | - |
| MI | Information  Theory | Baseline | | | | |
| PCC | Co-expression | Baseline | | | | |

**Supplementary Table S8.** Differentially expressed genes between the E-MTAB-8107 and GSE195665 datasets.

|  | **Gene symbol** | **avg_log2FC** |  | **Gene symbol** | **avg_log2FC** |  | **Gene symbol** | **avg_log2FC** |
| --- | --- | --- | --- | --- | --- | --- | --- | --- |
| 1 | *HSPA1B* | 7.4190 | 51 | *GCLC* | 1.5980 | 101 | *GADD45A* | 1.1761 |
| 2 | *HSPA1A* | 6.5050 | 52 | *STAT1* | 1.5918 | 102 | *ZNF331* | 1.1731 |
| 3 | *FABP4* | 5.8477 | 53 | *AREG* | 1.5828 | 103 | *IER3* | 1.1720 |
| 4 | *IGFBP7* | 5.6979 | 54 | *FKBP4* | 1.5790 | 104 | *ZCCHC2* | 1.1658 |
| 5 | *APOE* | 5.4704 | 55 | *CD74* | 1.5494 | 105 | *PDCL3* | 1.1651 |
| 6 | *CD24* | 4.6347 | 56 | *BCL6* | 1.4931 | 106 | *TRIM13* | 1.1643 |
| 7 | *SOX4* | 4.3693 | 57 | *AHI1* | 1.4653 | 107 | *TYMP* | 1.1582 |
| 8 | *HMOX1* | 4.0652 | 58 | *B3GNT2* | 1.4629 | 108 | *ZFAND5* | 1.1566 |
| 9 | *ATF3* | 3.3565 | 59 | *TUBB2A* | 1.4300 | 109 | *PDCL* | 1.1556 |
| 10 | *APOD* | 3.2434 | 60 | *KLF2* | 1.4187 | 110 | *DIP2A* | 1.1507 |
| 11 | *RHOB* | 3.2207 | 61 | *FADS3* | 1.4179 | 111 | *SLC25A4* | 1.1491 |
| 12 | *IFI27* | 2.9090 | 62 | *RABIF* | 1.4064 | 112 | *ZFP36* | 1.1455 |
| 13 | *CKS2* | 2.7783 | 63 | *HIF1A* | 1.4025 | 113 | *ATL2* | 1.1450 |
| 14 | *NR4A1* | 2.6661 | 64 | *AGPAT5* | 1.4022 | 114 | *NUDT4* | 1.1444 |
| 15 | *MGP* | 2.6563 | 65 | *RGS2* | 1.4006 | 115 | *ITCH* | 1.1390 |
| 16 | *TIMP3* | 2.5640 | 66 | *FAM53C* | 1.3978 | 116 | *RNF103* | 1.1367 |
| 17 | *CDKN1A* | 2.5634 | 67 | *STMN1* | 1.3968 | 117 | *HEXIM1* | 1.1367 |
| 18 | *DNAJB4* | 2.4373 | 68 | *MAP3K8* | 1.3963 | 118 | *RBM15* | 1.1321 |
| 19 | *PLAUR* | 2.4166 | 69 | *PMEPA1* | 1.3733 | 119 | *PTTG1* | 1.1237 |
| 20 | *FOSL2* | 2.4028 | 70 | *DNAJA1* | 1.3708 | 120 | *CLN8* | 1.1199 |
| 21 | *DNAJB1* | 2.3070 | 71 | *HSPE1* | 1.3673 | 121 | *DTNBP1* | 1.1159 |
| 22 | *DUSP5* | 2.2960 | 72 | *IFRD1* | 1.3563 | 122 | *MGAT2* | 1.1126 |
| 23 | *DCN* | 2.2540 | 73 | *STRN* | 1.3481 | 123 | *UBE2F* | 1.0966 |
| 24 | *IFI6* | 2.2536 | 74 | *PTS* | 1.3446 | 124 | *NAMPT* | 1.0966 |
| 25 | *CST3* | 2.2321 | 75 | *BTG2* | 1.3264 | 125 | *IRS2* | 1.0932 |
| 26 | *HSPH1* | 2.2272 | 76 | *PLSCR1* | 1.3247 | 126 | *TTC33* | 1.0850 |
| 27 | *COL1A2* | 2.2034 | 77 | *ZC3H12A* | 1.3052 | 127 | *IRF7* | 1.0830 |
| 28 | *IER5* | 2.1703 | 78 | *DDAH2* | 1.2918 | 128 | *UBN2* | 1.0818 |
| 29 | *IGFBP4* | 2.0617 | 79 | *NR4A2* | 1.2914 | 129 | *PPAN* | 1.0793 |
| 30 | *JUN* | 2.0558 | 80 | *HOOK3* | 1.2886 | 130 | *BAG3* | 1.0777 |
| 31 | *GSN* | 2.0349 | 81 | *DCTN6* | 1.2812 | 131 | *ANKRD37* | 1.0759 |
| 32 | *ID3* | 1.9975 | 82 | *HSP90AA1* | 1.2754 | 132 | *MDM2* | 1.0749 |
| 33 | *RGS16* | 1.9705 | 83 | *TLE3* | 1.2679 | 133 | *MRPL40* | 1.0695 |
| 34 | *CREM* | 1.9506 | 84 | *DUSP2* | 1.2673 | 134 | *SDF2L1* | 1.0656 |
| 35 | *FABP5* | 1.9051 | 85 | *HSPD1* | 1.2491 | 135 | *TGIF1* | 1.0630 |
| 36 | *EIF4EBP1* | 1.8480 | 86 | *MXD1* | 1.2456 | 136 | *UFSP2* | 1.0618 |
| 37 | *MX1* | 1.8320 | 87 | *RIT1* | 1.2439 | 137 | *RAP2B* | 1.0617 |
| 38 | *CDKN2AIP* | 1.8172 | 88 | *CHORDC1* | 1.2416 | 138 | *CD9* | 1.0562 |
| 39 | *SERTAD1* | 1.7927 | 89 | *PFKFB3* | 1.2408 | 139 | *ARL5B* | 1.0538 |
| 40 | *MAFF* | 1.7412 | 90 | *JUNB* | 1.2252 | 140 | *ZNF330* | 1.0535 |
| 41 | *IER2* | 1.7332 | 91 | *PHF23* | 1.2106 | 141 | *REXO2* | 1.0484 |
| 42 | *GADD45B* | 1.7037 | 92 | *DFFA* | 1.2098 | 142 | *COMMD3* | 1.0482 |
| 43 | *GLA* | 1.6894 | 93 | *IRF1* | 1.2094 | 143 | *UBE2E1* | 1.0479 |
| 44 | *TGIF2* | 1.6887 | 94 | *TAP2* | 1.2013 | 144 | *ARL4A* | 1.0478 |
| 45 | *ATP6V1D* | 1.6829 | 95 | *KLF10* | 1.1948 | 145 | *CHFR* | 1.0472 |
| 46 | *FNDC3B* | 1.6640 | 96 | *DCUN1D1* | 1.1900 | 146 | *EPSTI1* | 1.0447 |
| 47 | *FAM118A* | 1.6452 | 97 | *FOSB* | 1.1883 | 147 | *CREG1* | 1.0415 |
| 48 | *ZBTB16* | -1.6190 | 98 | *DAAM1* | 1.1846 | 148 | *SKIL* | 1.0407 |
| 49 | *GBP4* | 1.6152 | 99 | *CEBPD* | 1.1797 | 149 | *LYSMD2* | 1.0400 |
| 50 | *ISG15* | 1.6005 | 100 | *FGL2* | 1.1763 | 150 | *CACYBP* | 1.0382 |

**Supplementary Table S9.** Differentially expressed genes in the GSE114725 dataset.

|  | **Gene symbol** | **avg_log2FC** |  | **Gene symbol** | **avg_log2FC** |  | **Gene symbol** | **avg_log2FC** |
| --- | --- | --- | --- | --- | --- | --- | --- | --- |
| 1 | *METRNL* | -5.9676 | 51 | *CD81* | -3.2202 | 101 | *CDYL* | -2.7949 |
| 2 | *CXCL2* | -5.7921 | 52 | *IRS2* | -3.2073 | 102 | *DYNLL2* | -2.7901 |
| 3 | *THBS1* | -4.8174 | 53 | *PLCG2* | -3.2052 | 103 | *RNF169* | -2.7872 |
| 4 | *NFIL3* | -4.7693 | 54 | *SOS2* | -3.1926 | 104 | *B4GALT5* | -2.7871 |
| 5 | *ZFPM1* | -4.7323 | 55 | *TLK2* | -3.1923 | 105 | *PPP2CB* | -2.7860 |
| 6 | *EMP1* | -4.4806 | 56 | *DNAJC21* | -3.1862 | 106 | *LUZP1* | -2.7847 |
| 7 | *MXRA7* | -4.4518 | 57 | *SLC12A2* | -3.1645 | 107 | *LARP1B* | -2.7825 |
| 8 | *NDUFB8* | -4.2000 | 58 | *BRI3* | -3.1572 | 108 | *HIPK1* | -2.7824 |
| 9 | *ELL2* | -4.1664 | 59 | *CCNYL1* | -3.1431 | 109 | *IFITM3* | 2.7695 |
| 10 | *TM4SF1* | -4.1261 | 60 | *CEBPD* | -3.1346 | 110 | *GSPT1* | -2.7649 |
| 11 | *SRP19* | -4.0326 | 61 | *BTBD6* | -3.1186 | 111 | *GABARAPL1* | -2.7458 |
| 12 | *CTNNAL1* | -4.0290 | 62 | *SAA1* | -3.1093 | 112 | *CD74* | 2.7439 |
| 13 | *RHOQ* | -3.9694 | 63 | *SIK3* | -3.0993 | 113 | *MXD4* | -2.7408 |
| 14 | *PMEPA1* | -3.9581 | 64 | *B2M* | 3.0989 | 114 | *DAAM1* | -2.7389 |
| 15 | *ENDOG* | -3.9143 | 65 | *IER5* | -3.0875 | 115 | *RBM7* | -2.7320 |
| 16 | *VKORC1* | -3.8899 | 66 | *SAP30L* | -3.0771 | 116 | *GSK3A* | -2.7250 |
| 17 | *ZNF787* | -3.8802 | 67 | *QKI* | -3.0591 | 117 | *KCMF1* | -2.7218 |
| 18 | *ZNRF2* | -3.8800 | 68 | *TAPT1* | -3.0547 | 118 | *RAPGEF2* | -2.7189 |
| 19 | *CFD* | -3.8718 | 69 | *RAB21* | -3.0526 | 119 | *TOR1AIP2* | -2.7141 |
| 20 | *MRPL12* | -3.8312 | 70 | *NDUFC2* | -3.0445 | 120 | *HECA* | -2.7109 |
| 21 | *HOMER1* | -3.8264 | 71 | *EEF1A1* | 3.0075 | 121 | *BRD7* | -2.7074 |
| 22 | *PMF1* | -3.8198 | 72 | *KLF16* | -3.0057 | 122 | *PPAN* | -2.7038 |
| 23 | *CDKN1C* | -3.8177 | 73 | *TIPARP* | -2.9964 | 123 | *SMAP2* | -2.7000 |
| 24 | *UBE2M* | -3.8021 | 74 | *FOSL2* | -2.9689 | 124 | *TERF2* | -2.6971 |
| 25 | *MXI1* | -3.7766 | 75 | *GADD45A* | -2.9617 | 125 | *JMY* | -2.6933 |
| 26 | *CLDN4* | -3.7591 | 76 | *DST* | -2.9424 | 126 | *SIRT1* | -2.6930 |
| 27 | *SYNC* | -3.7534 | 77 | *PTPN12* | -2.9417 | 127 | *HDGF* | -2.6732 |
| 28 | *BRD1* | -3.7302 | 78 | *NANS* | -2.9324 | 128 | *TRIM24* | -2.6693 |
| 29 | *SCGB2A2* | -3.7091 | 79 | *FRAT2* | -2.9222 | 129 | *NFKB1* | -2.6649 |
| 30 | *ATP1B3* | -3.7078 | 80 | *ATF3* | -2.9134 | 130 | *SLFN11* | -2.6639 |
| 31 | *SAP30* | -3.6767 | 81 | *VEGFB* | -2.9063 | 131 | *UBE2Q1* | -2.6614 |
| 32 | *TIMP2* | -3.6509 | 82 | *OTUD1* | -2.9055 | 132 | *SFRP1* | -2.6613 |
| 33 | *ERRFI1* | -3.6001 | 83 | *FABP4* | -2.9040 | 133 | *ZRANB1* | -2.6552 |
| 34 | *EID2* | -3.5644 | 84 | *PLAUR* | -2.8894 | 134 | *LACTB* | -2.6459 |
| 35 | *MALAT1* | 3.5057 | 85 | *ARID1B* | -2.8888 | 135 | *FURIN* | -2.6458 |
| 36 | *PSMA2* | -3.4991 | 86 | *CHPT1* | -2.8855 | 136 | *ZBTB10* | -2.6448 |
| 37 | *JUND* | -3.4757 | 87 | *CDV3* | -2.8854 | 137 | *RCOR1* | -2.6412 |
| 38 | *EXOSC6* | -3.4726 | 88 | *TP53BP2* | -2.8749 | 138 | *ANKRD28* | -2.6382 |
| 39 | *EPB41L2* | -3.4474 | 89 | *PPP1R14B* | -2.8642 | 139 | *UBE2O* | -2.6382 |
| 40 | *MAFG* | -3.4217 | 90 | *OGFRL1* | -2.8628 | 140 | *MBD2* | -2.6376 |
| 41 | *ZSWIM6* | -3.3953 | 91 | *CRIM1* | -2.8591 | 141 | *PGRMC2* | -2.6343 |
| 42 | *CCL2* | -3.3916 | 92 | *ARHGAP5* | -2.8524 | 142 | *LMNA* | -2.6293 |
| 43 | *NNMT* | -3.3798 | 93 | *IFI27* | 2.8506 | 143 | *ATP1B1* | -2.6233 |
| 44 | *CSNK2A2* | -3.3541 | 94 | *DCTN6* | -2.8467 | 144 | *PLEKHO1* | -2.6220 |
| 45 | *TNFRSF12A* | -3.3129 | 95 | *BRAF* | -2.8377 | 145 | *PINK1* | -2.6202 |
| 46 | *JOSD1* | -3.3085 | 96 | *TRAPPC10* | -2.8350 | 146 | *FGL2* | -2.6183 |
| 47 | *TACSTD2* | -3.2945 | 97 | *TESK1* | -2.8230 | 147 | *CENPB* | -2.6166 |
| 48 | *DCN* | -3.2857 | 98 | *ZBTB16* | -2.8113 | 148 | *CHSY1* | -2.6128 |
| 49 | *FAM89B* | -3.2773 | 99 | *FADS3* | -2.8073 | 149 | *STARD10* | -2.6116 |
| 50 | *TSIX* | -3.2285 | 100 | *RYBP* | -2.8062 | 150 | *MAP3K12* | -2.6009 |

**Supplementary Table S10.** Filtered gene sets from T cell and breast cancer pathways.

| **T cell pathway** | | | | **Breast cancer pathway** | | | |
| --- | --- | --- | --- | --- | --- | --- | --- |
| 1 | *FYN* | 29 | *MAP2K7* | 1 | *NCOA1* | 29 | *CTNNB1* |
| 2 | *NCK1* | 30 | *MAPK8* | 2 | *NCOA3* | 30 | *CSNK1A1* |
| 3 | *NCK2* | 31 | *MAPK9* | 3 | *FOS* | 31 | *GADD45A* |
| 4 | *GRB2* | 32 | *IKBKB* | 4 | *JUN* | 32 | *GADD45B* |
| 5 | *PAK2* | 33 | *NFKB1* | 5 | *SP1* | 33 | *BAX* |
| 6 | *RHOA* | 34 | *RELA* | 6 | *MYC* | 34 | *POLK* |
| 7 | *CDC42* | 35 | *NFKBIA* | 7 | *GRB2* | 35 | *CDK4* |
| 8 | *DLG1* | 36 | *NFKBIB* | 8 | *SOS1* | 36 | *CDK6* |
| 9 | *MAPK14* | 37 | *PIK3R1* | 9 | *SOS2* | 37 | *RB1* |
| 10 | *PPP3CA* | 38 | *PIK3CA* | 10 | *HRAS* |  |  |
| 11 | *PPP3CC* | 39 | *PDPK1* | 11 | *KRAS* |  |  |
| 12 | *PPP3R1* | 40 | *AKT1* | 12 | *NRAS* |  |  |
| 13 | *NFATC1* | 41 | *AKT2* | 13 | *BRAF* |  |  |
| 14 | *NFATC2* | 42 | *AKT3* | 14 | *RAF1* |  |  |
| 15 | *NFATC3* | 43 | *MAP3K8* | 15 | *MAP2K1* |  |  |
| 16 | *SOS1* | 44 | *GSK3B* | 16 | *MAP2K2* |  |  |
| 17 | *SOS2* | 45 | *PTPN11* | 17 | *MAPK1* |  |  |
| 18 | *HRAS* | 46 | *PPP2CA* | 18 | *PIK3CA* |  |  |
| 19 | *KRAS* | 47 | *PPP2CB* | 19 | *PIK3R1* |  |  |
| 20 | *NRAS* | 48 | *PPP2R1A* | 20 | *PTEN* |  |  |
| 21 | *RAF1* | 49 | *PPP2R2A* | 21 | *AKT1* |  |  |
| 22 | *MAP2K1* | 50 | *PPP2R2D* | 22 | *AKT2* |  |  |
| 23 | *MAP2K2* | 51 | *PPP2R3C* | 23 | *AKT3* |  |  |
| 24 | *MAPK1* | 52 | *PPP2R5C* | 24 | *CDKN1A* |  |  |
| 25 | *FOS* | 53 | *PPP2R5E* | 25 | *NFKB2* |  |  |
| 26 | *JUN* | 54 | *PPP2R5A* | 26 | *FRAT2* |  |  |
| 27 | *BCL10* | 55 | *CBLB* | 27 | *GSK3B* |  |  |
| 28 | *MALT1* | 56 | *CDK4* | 28 | *APC* |  |  |

**Supplementary Table S11.** Gene set of interest constructed for T cells.

| *HSPA1B* | *ZBTB16* | *KLF10* | *COMMD3* | *MAFG* | *RYBP* | *FYN* | *PPP2R5E* |
| --- | --- | --- | --- | --- | --- | --- | --- |
| *HSPA1A* | *GBP4* | *DCUN1D1* | *UBE2E1* | *ZSWIM6* | *CDYL* | *NCK1* | *PPP2R5A* |
| *FABP4* | *ISG15* | *FOSB* | *ARL4A* | *CCL2* | *DYNLL2* | *NCK2* | *CBLB* |
| *IGFBP7* | *GCLC* | *DAAM1* | *CHFR* | *NNMT* | *RNF169* | *GRB2* | *CDK4* |
| *APOE* | *STAT1* | *CEBPD* | *EPSTI1* | *CSNK2A2* | *B4GALT5* | *PAK2* | *NCOA1* |
| *CD24* | *AREG* | *FGL2* | *CREG1* | *TNFRSF12A* | *PPP2CB* | *RHOA* | *NCOA3* |
| *SOX4* | *FKBP4* | *GADD45A* | *SKIL* | *JOSD1* | *LUZP1* | *CDC42* | *SP1* |
| *HMOX1* | *CD74* | *ZNF331* | *LYSMD2* | *TACSTD2* | *LARP1B* | *DLG1* | *MYC* |
| *ATF3* | *BCL6* | *IER3* | *CACYBP* | *FAM89B* | *HIPK1* | *MAPK14* | *PTEN* |
| *APOD* | *AHI1* | *ZCCHC2* | *METRNL* | *TSIX* | *IFITM3* | *PPP3CA* | *NFKB2* |
| *RHOB* | *B3GNT2* | *PDCL3* | *CXCL2* | *CD81* | *GSPT1* | *PPP3CC* | *APC* |
| *IFI27* | *TUBB2A* | *TRIM13* | *THBS1* | *PLCG2* | *GABARAPL1* | *PPP3R1* | *CTNNB1* |
| *CKS2* | *KLF2* | *TYMP* | *NFIL3* | *SOS2* | *MXD4* | *NFATC1* | *CSNK1A1* |
| *NR4A1* | *FADS3* | *ZFAND5* | *ZFPM1* | *TLK2* | *RBM7* | *NFATC2* | *BAX* |
| *MGP* | *RABIF* | *PDCL* | *EMP1* | *DNAJC21* | *GSK3A* | *NFATC3* | *POLK* |
| *TIMP3* | *HIF1A* | *DIP2A* | *MXRA7* | *SLC12A2* | *KCMF1* | *SOS1* | *CDK6* |
| *CDKN1A* | *AGPAT5* | *SLC25A4* | *NDUFB8* | *BRI3* | *RAPGEF2* | *HRAS* | *RB1* |
| *DNAJB4* | *RGS2* | *ZFP36* | *ELL2* | *CCNYL1* | *TOR1AIP2* | *KRAS* | *FAM118A* |
| *PLAUR* | *FAM53C* | *ATL2* | *TM4SF1* | *BTBD6* | *HECA* | *NRAS* | *TAP2* |
| *FOSL2* | *STMN1* | *NUDT4* | *SRP19* | *SAA1* | *BRD7* | *RAF1* | *REXO2* |
| *DNAJB1* | *MAP3K8* | *ITCH* | *CTNNAL1* | *SIK3* | *SMAP2* | *MAP2K1* | *EPB41L2* |
| *DUSP5* | *PMEPA1* | *RNF103* | *RHOQ* | *B2M* | *TERF2* | *MAP2K2* | *TESK1* |
| *DCN* | *DNAJA1* | *HEXIM1* | *ENDOG* | *SAP30L* | *JMY* | *MAPK1* | *MAP3K12* |
| *IFI6* | *HSPE1* | *RBM15* | *VKORC1* | *QKI* | *SIRT1* | *FOS* | *PPP2R5C* |
| *CST3* | *IFRD1* | *PTTG1* | *ZNF787* | *TAPT1* | *HDGF* | *BCL10* |  |
| *HSPH1* | *STRN* | *CLN8* | *ZNRF2* | *RAB21* | *TRIM24* | *MALT1* |  |
| *COL1A2* | *PTS* | *DTNBP1* | *CFD* | *NDUFC2* | *NFKB1* | *MAP2K7* |  |
| *IER5* | *BTG2* | *MGAT2* | *MRPL12* | *EEF1A1* | *SLFN11* | *MAPK8* |  |
| *IGFBP4* | *PLSCR1* | *UBE2F* | *HOMER1* | *KLF16* | *UBE2Q1* | *MAPK9* |  |
| *JUN* | *ZC3H12A* | *NAMPT* | *PMF1* | *TIPARP* | *SFRP1* | *IKBKB* |  |
| *GSN* | *DDAH2* | *IRS2* | *CDKN1C* | *DST* | *ZRANB1* | *RELA* |  |
| *ID3* | *NR4A2* | *TTC33* | *UBE2M* | *PTPN12* | *LACTB* | *NFKBIA* |  |
| *RGS16* | *HOOK3* | *IRF7* | *MXI1* | *NANS* | *FURIN* | *NFKBIB* |  |
| *CREM* | *DCTN6* | *UBN2* | *CLDN4* | *FRAT2* | *ZBTB10* | *PIK3R1* |  |
| *FABP5* | *HSP90AA1* | *PPAN* | *SYNC* | *VEGFB* | *RCOR1* | *PIK3CA* |  |
| *EIF4EBP1* | *TLE3* | *BAG3* | *BRD1* | *OTUD1* | *ANKRD28* | *PDPK1* |  |
| *MX1* | *DUSP2* | *ANKRD37* | *SCGB2A2* | *ARID1B* | *UBE2O* | *AKT1* |  |
| *CDKN2AIP* | *HSPD1* | *MDM2* | *ATP1B3* | *CHPT1* | *MBD2* | *AKT2* |  |
| *SERTAD1* | *MXD1* | *MRPL40* | *SAP30* | *CDV3* | *PGRMC2* | *AKT3* |  |
| *MAFF* | *RIT1* | *SDF2L1* | *TIMP2* | *TP53BP2* | *LMNA* | *GSK3B* |  |
| *IER2* | *CHORDC1* | *TGIF1* | *ERRFI1* | *PPP1R14B* | *ATP1B1* | *PTPN11* |  |
| *GADD45B* | *PFKFB3* | *UFSP2* | *EID2* | *OGFRL1* | *PLEKHO1* | *PPP2CA* |  |
| *GLA* | *JUNB* | *RAP2B* | *MALAT1* | *CRIM1* | *PINK1* | *PPP2R1A* |  |
| *TGIF2* | *PHF23* | *CD9* | *PSMA2* | *ARHGAP5* | *CENPB* | *PPP2R2A* |  |
| *ATP6V1D* | *DFFA* | *ARL5B* | *JUND* | *BRAF* | *CHSY1* | *PPP2R2D* |  |
| *FNDC3B* | *IRF1* | *ZNF330* | *EXOSC6* | *TRAPPC10* | *STARD10* | *PPP2R3C* |  |

**Supplementary Table S12.** Differentially expressed genes from E-MTAB-8107 dataset used as anchor points in ARIC decomposition.

| *A1BG* | *JAKMIP2* | *CYGB* | *PTH1R* | *C5orf56* | *NCK2* | *GALNT10* | *SORL1* | *WASF3* |
| --- | --- | --- | --- | --- | --- | --- | --- | --- |
| *AADAC* | *JOSD1* | *CYP26B1* | *PTMA* | *C8orf4* | *NCL* | *GALNT3* | *SOX15* | *WBP5* |
| *ABCA10* | *JSRP1* | *CYP2R1* | *PTPN22* | *C9orf142* | *NCR3* | *GALT* | *SOX5* | *WBSCR22* |
| *ABCA2* | *JTB* | *CYP4X1* | *PTPN4* | *C9orf3* | *NCS1* | *GAPDH* | *SPAG4* | *WFDC1* |
| *ABCA7* | *JUN* | *CYR61* | *PTPN6* | *CAB39L* | *NDN* | *GAPT* | *SPARC* | *WHSC1L1* |
| *ABCA8* | *KAZALD1* | *DAD1* | *PTPRCAP* | *CACNB2* | *NDUFA4L2* | *GAS1* | *SPATA13* | *WISP1* |
| *ABCA9* | *KBTBD8* | *DAPP1* | *PTPRD* | *CACNB4* | *NEDD4L* | *GDF10* | *SPCS1* | *WISP2* |
| *ABCB1* | *KCNA3* | *DARS* | *PTPRF* | *CADM1* | *NEDD8* | *GDF11* | *SPG20* | *WNT10A* |
| *ABCB4* | *KCNE4* | *DCLK1* | *PTPRS* | *CADPS2* | *NEGR1* | *GEN1* | *SPIB* | *WNT11* |
| *ABCB9* | *KCNH8* | *DCN* | *PTRF* | *CALB2* | *NEIL1* | *Gene Symbol* | *SPINK2* | *WNT16* |
| *ABCC10* | *KCNJ8* | *DDR1* | *PVRL4* | *CALD1* | *NEK8* | *GET4* | *SPINT1* | *WNT2* |
| *ABCD2* | *KCNK12* | *DDX26B* | *PYGO1* | *CALM1* | *NEXN* | *GFI1* | *SPN* | *XCL1* |
| *ABHD14A* | *KCNMB4* | *DDX60* | *PYHIN1* | *CALML5* | *NFXL1* | *GFPT2* | *SPNS3* | *XCL2* |
| *ABI3BP* | *KCNN3* | *DENND1C* | *QPCT* | *CAMK4* | *NGFRAP1* | *GFRA1* | *SPOCK1* | *XG* |
| *ADAM12* | *KCNT2* | *DENND2A* | *QPRT* | *CANX* | *NIPAL3* | *GGH* | *SPOCK2* | *YWHAB* |
| *ADAM28* | *KCTD1* | *DENND2C* | *QRSL1* | *CAP1* | *NKD2* | *GGT5* | *SQSTM1* | *ZAP70* |
| *ADAMTS15* | *KCTD13* | *DENND5B* | *RAB11FIP4* | *CARD11* | *NKG7* | *GHITM* | *SRPX* | *ZBED4* |
| *ADAMTS5* | *KDELC2* | *DERL3* | *RAB24* | *CASK* | *NLGN1* | *GHR* | *SRRM1* | *ZBP1* |
| *ADH1B* | *KDELR2* | *DFNB31* | *RAB25* | *CASP10* | *NOP10* | *GIMAP1* | *SSC5D* | *ZBTB1* |
| *ADH1C* | *KHDRBS2* | *DIO3OS* | *RAB30* | *CASP6* | *NOTCH3* | *GKAP1* | *SSR2* | *ZBTB32* |
| *ADM2* | *KIAA0125* | *DKK3* | *RAB33A* | *CASP8* | *NOVA1* | *GLCCI1* | *SSR4* | *ZC3H12D* |
| *ADORA2A* | *KIAA0391* | *DMKN* | *RAB37* | *CASQ2* | *NOX4* | *GLI2* | *ST5* | *ZCCHC11* |
| *ADPRHL1* | *KIAA0430* | *DNAJB9* | *RAB39B* | *CBFA2T3* | *NR2F1* | *GLIPR1* | *ST6GAL1* | *ZDBF2* |
| *ADRA2A* | *KIAA0922* | *DOCK10* | *RABAC1* | *CCBE1* | *NRIP2* | *GLIS1* | *ST6GALNAC6* | *ZDHHC23* |
| *ADRBK1* | *KIAA1033* | *DOK3* | *RAC3* | *CCDC102B* | *NSA2* | *GLMN* | *ST8SIA1* | *ZFAND5* |
| *AEBP1* | *KIAA1468* | *DOK6* | *RALGPS2* | *CCDC109B* | *NT5DC2* | *GLT8D2* | *STAC2* | *ZFHX4* |
| *AES* | *KIF20B* | *DPEP1* | *RARRES2* | *CCDC112* | *NTRK2* | *GLTSCR2* | *STAG3* | *ZFP14* |
| *AFF3* | *KIF21A* | *DPP4* | *RARRES3* | *CCDC141* | *NTRK3* | *GNAS* | *STAMBPL1* | *ZFPM1* |
| *AGAP2* | *KIF21B* | *DPT* | *RASGRP1* | *CCDC53* | *NUAK2* | *GNB2L1* | *STAP1* | *ZFYVE28* |
| *AGFG2* | *KIF3A* | *DSP* | *RASL12* | *CCDC64* | *OBFC1* | *GNG7* | *STAT4* | *ZGPAT* |
| *AGK* | *KIF5C* | *DTHD1* | *RASSF6* | *CCDC8* | *OGN* | *GPC3* | *STEAP1* | *ZNF101* |
| *AGTR1* | *KIRREL* | *DUSP10* | *RBL1* | *CCDC84* | *OLFML1* | *GPC4* | *STEAP2* | *ZNF14* |
| *AIG1* | *KLHDC7B* | *DUSP16* | *RBM34* | *CCL19* | *OMD* | *GPC6* | *STRBP* | *ZNF165* |
| *AIM1* | *KLHL14* | *DUSP5* | *RBM38* | *CCL21* | *ORAI1* | *GPR160* | *SUPT3H* | *ZNF215* |
| *AIM2* | *KLHL6* | *E2F5* | *RBM8A* | *CCL3L3* | *ORAOV1* | *GPR171* | *SUSD2* | *ZNF266* |
| *AKAP2* | *KLK10* | *EAF2* | *RBMX* | *CCL4* | *OSBPL10* | *GPR174* | *SVEP1* | *ZNF275* |
| *AKAP5* | *KLK5* | *ECM2* | *RBP5* | *CCL5* | *OSBPL3* | *GPR18* | *SYK* | *ZNF296* |
| *AKAP7* | *KLK6* | *EDARADD* | *RBPMS2* | *CCPG1* | *OSR2* | *GPR20* | *SYNGR1* | *ZNF410* |
| *AKNA* | *KLK7* | *EDC4* | *RCAN2* | *CCR10* | *P2RX1* | *GPR25* | *SYNGR2* | *ZNF414* |
| *ALDH1L2* | *KLK8* | *EDEM2* | *RCAN3* | *CCR4* | *P2RX5* | *GPR65* | *SYNM* | *ZNF460* |
| *ALDOA* | *KLRB1* | *EDIL3* | *REC8* | *CCR6* | *P2RY10* | *GPRC5C* | *SYNPO2* | *ZNF600* |
| *ALG12* | *KLRC1* | *EDN2* | *REM1* | *CD180* | *P2RY8* | *GPRIN3* | *SYTL2* | *ZNF675* |
| *ALG14* | *KLRC2* | *EDNRA* | *RERG* | *CD19* | *PA2G4* | *GPX1* | *SYTL3* | *ZNF683* |
| *ALKBH6* | *KLRC3* | *EEF1A1* | *RERGL* | *CD1D* | *PAGE2* | *GPX8* | *SYVN1* | *ZNF76* |
| *ALOX5* | *KLRD1* | *EEF1G* | *RGMA* | *CD200R1* | *PAIP2B* | *GRAMD1B* | *TAC1* | *ZNF831* |
| *ALX4* | *KLRK1* | *EGFR* | *RGS4* | *CD22* | *PAMR1* | *GRAMD1C* | *TADA2B* | *ZNF860* |
| *AMBRA1* | *KNTC1* | *EHF* | *RGS5* | *CD226* | *PAOX* | *GRAP2* | *TARSL2* | *ZNF862* |
| *AMN* | *KRT10* | *EID1* | *RHBDD1* | *CD24* | *PAPPA* | *GRB14* | *TAS1R3* | *ZNRD1* |
| *AMPD1* | *KRT14* | *EIF1AX* | *RHOBTB2* | *CD244* | *PAQR8* | *GRB2* | *TBCEL* | *ZNRF2* |
| *AMPH* | *KRT15* | *EIF2AK3* | *RIC3* | *CD247* | *PARD6G* | *GRIA3* | *TBX15* | *CYB561D1* |
| *ANGPT1* | *KRT16* | *EIF2AK4* | *RINL* | *CD248* | *PARM1* | *GRID1* | *TBX2* | *CYB561D2* |
| *ANGPT4* | *KRT17* | *EIF3I* | *RIPK3* | *CD28* | *PARP15* | *GRIP2* | *TCEAL5* | *CYCS* |
| *ANGPTL1* | *KRT19* | *EIF4B* | *RLTPR* | *CD37* | *PARP16* | *GSC* | *TCEAL7* | *PTGES3* |
| *ANK2* | *KRT23* | *EIF4E3* | *RNASE4* | *CD38* | *PARP8* | *GSTA1* | *TCEB2* | *PTGFR* |
| *ANK3* | *KRT5* | *EIF4G2* | *RNASEL* | *CD3E* | *PART1* | *GSTO2* | *TCF25* | *PTGIS* |
| *ANKMY1* | *KRT6B* | *ELF3* | *RNF125* | *CD3G* | *PASK* | *GUCY1A2* | *TCF7* | *ITM2B* |
| *ANKRD28* | *KRT8* | *ELF5* | *RNH1* | *CD40LG* | *PATL2* | *GUCY1A3* | *TCL1A* | *ITPRIPL1* |
| *ANKRD39* | *KRT81* | *ELL3* | *ROPN1* | *CD72* | *PAX3* | *GUCY1B3* | *TDO2* | *JAKMIP1* |
| *ANO1* | *KRT86* | *ELMO2* | *ROPN1B* | *CD74* | *PAX5* | *GUCY2C* | *TESK2* | *VNN2* |
| *ANO9* | *KRTCAP3* | *EMB* | *RORA* | *CD79A* | *PBX4* | *GYLTL1B* | *TET1* | *VPREB3* |
| *ANTXR1* | *L1TD1* | *EML2* | *RRAD* | *CD79B* | *PBXIP1* | *GZMK* | *TEX9* | *VTCN1* |
| *ANXA1* | *LAD1* | *EMX2* | *RSPO3* | *CD83* | *PCDH7* | *GZMM* | *TFAP2A* |  |
| *ANXA5* | *LAG3* | *EMX2OS* | *RTKN2* | *CD8B* | *PCDH9* | *H1F0* | *TFAP2C* |  |
| *AOX1* | *LAIR2* | *ENPEP* | *RUNX3* | *CD96* | *PCDHB16* | *H1FX* | *TFB1M* |  |
| *AP1M2* | *LALBA* | *ENPP1* | *RWDD1* | *CD99* | *PCNX* | *H2AFJ* | *TFCP2L1* |  |
| *AP1S3* | *LAMA1* | *EOMES* | *S100A1* | *CDC14A* | *PCNXL2* | *H2AFX* | *TGFB1* |  |
| *AP3M2* | *LAT2* | *EPB41* | *S100A14* | *CDC20* | *PCOLCE* | *H2AFZ* | *THAP2* |  |
| *AP4B1* | *LCN10* | *EPCAM* | *S100A2* | *CDCA7L* | *PCOLCE2* | *H3F3A* | *THAP6* |  |
| *APBA2* | *LDB3* | *EPHA1* | *S100B* | *CDH1* | *PCP4* | *H3F3B* | *THBS2* |  |
| *APCDD1* | *LEPROTL1* | *EPHB6* | *S100P* | *CDH6* | *PDCL3* | *HAND2* | *THBS4* |  |
| *APOBEC3D* | *LFNG* | *EPRS* | *S1PR3* | *CDKN2A* | *PDE1A* | *HAS2* | *THEMIS* |  |
| *APOBEC3H* | *LGALS7B* | *ERBB2IP* | *S1PR4* | *CDO1* | *PDE3A* | *HAUS3* | *THRAP3* |  |
| *AR* | *LGI4* | *ERBB3* | *SAMD3* | *CDON* | *PDE3B* | *HCG11* | *THY1* |  |
| *ARAP2* | *LHFP* | *ERCC5* | *SAP18* | *CEACAM21* | *PDE4D* | *HELB* | *TIMP1* |  |
| *ARHGAP24* | *LIME1* | *ERN1* | *SARDH* | *CECR1* | *PDE5A* | *HERPUD1* | *TIMP3* |  |
| *ARHGDIA* | *LMF1* | *ERP29* | *SASH3* | *CENPK* | *PDE7A* | *HEY2* | *TIMP4* |  |
| *ARHGEF17* | *LMNB1* | *ESR2* | *SAT1* | *CENPM* | *PDGFRA* | *HEYL* | *TLR10* |  |
| *ARID3A* | *LONRF2* | *ESRP1* | *SATB1* | *CEP78* | *PDGFRB* | *HIGD1B* | *TLR6* |  |
| *ARL11* | *LOX* | *ETS1* | *SCAI* | *CFB* | *PDGFRL* | *HIPK1* | *TM7SF2* |  |
| *ARL4C* | *LPAR1* | *ETV7* | *SCAMP5* | *CFL2* | *PDIA3* | *HIPK2* | *TMED10* |  |
| *ARL6IP4* | *LPAR2* | *EVI2A* | *SCARA3* | *CHAC1* | *PDK1* | *HIST1H4C* | *TMEM116* |  |
| *ARPC1B* | *LPAR5* | *F10* | *SCARA5* | *CHI3L1* | *PDPN* | *HLA-A* | *TMEM120B* |  |
| *ASB2* | *LPIN3* | *F5* | *SCN4B* | *CHI3L2* | *PDZK1IP1* | *HLA-DMA* | *TMEM132C* |  |
| *ASNS* | *LRFN5* | *FAAH2* | *SCNN1B* | *CHL1* | *PELI1* | *HLA-DMB* | *TMEM140* |  |
| *ASPN* | *LRIG1* | *FAM102A* | *SDC1* | *CHPF* | *PENK* | *HLA-DOA* | *TMEM156* |  |
| *ATAD3C* | *LRMP* | *FAM105A* | *SDK1* | *CHRDL1* | *PFN1* | *HLA-DOB* | *TMEM173* |  |
| *ATG16L1* | *LRP11* | *FAM117A* | *SEC11A* | *CHRNB1* | *PFN2* | *HLA-DPA1* | *TMEM19* |  |
| *ATG4A* | *LRP3* | *FAM127A* | *SEC11C* | *CHST2* | *PGAP1* | *HLA-DPB1* | *TMEM2* |  |
| *ATHL1* | *LRRC15* | *FAM127C* | *SEC24A* | *CIITA* | *PGK1* | *HLA-DQA1* | *TMEM200B* |  |
| *ATP1B2* | *LRRC17* | *FAM129A* | *SEL1L* | *CILP* | *PHGDH* | *HLA-DQA2* | *TMEM55B* |  |
| *ATP2A3* | *LRRN4CL* | *FAM129C* | *SEL1L3* | *CISH* | *PHKG1* | *HLA-DQB1* | *TMEM56* |  |
| *ATP5A1* | *LTA* | *FAM134B* | *SELK* | *CLDN3* | *PHLPP2* | *HLA-DRA* | *TMEM71* |  |
| *ATP5D* | *LUM* | *FAM134C* | *SELL* | *CLDN7* | *PHYHIP* | *HLA-DRB1* | *TMIGD2* |  |
| *ATP5E* | *LY86* | *FAM159A* | *SELM* | *CLEC11A* | *PIGB* | *HLA-DRB5* | *TMSB10* |  |
| *ATP5G2* | *LY9* | *FAM162B* | *SELT* | *CLEC17A* | *PIK3CG* | *HMGA2* | *TNFRSF13B* | |
| *ATP5G3* | *LY96* | *FAM173A* | *SEMA3D* | *CLEC2D* | *PIK3IP1* | *HMGN4* | *TNFRSF13C* | |
| *ATP5J2* | *MADD* | *FAM177B* | *SEMA4B* | *CLEC3B* | *PIM2* | *HMHA1* | *TNFRSF17* |  |
| *ATP5L* | *MAL2* | *FAM180A* | *SEMA5A* | *CLECL1* | *PIP4K2A* | *HN1* | *TNFRSF25* |  |
| *ATP6V0B* | *MALAT1* | *FAM198B* | *SEMA7A* | *CLN3* | *PIP4K2C* | *HNRNPA0* | *TNFSF14* |  |
| *ATP6V0C* | *MAN2B1* | *FAM26F* | *SEPP1* | *CLPTM1L* | *PIP5K1B* | *HNRNPA3* | *TNFSF8* |  |
| *ATP8A1* | *MANEA* | *FAM46A* | *SEPW1* | *CLSTN2* | *PITPNC1* | *HNRNPF* | *TNFSF9* |  |
| *ATXN7* | *MAP2K5* | *FAM46C* | *SERBP1* | *CMBL* | *PKDCC* | *HNRNPM* | *TNIK* |  |
| *ATXN7L1* | *MAP3K9* | *FAM49A* | *SERPINA5* | *CNFN* | *PKHD1L1* | *HNRNPU* | *TNN* |  |
| *AUTS2* | *MAP4K1* | *FAM49B* | *SERPINB5* | *CNNM3* | *PKIA* | *HOMER2* | *TNNT3* |  |
| *AVEN* | *MAP4K2* | *FAM60A* | *SERPING1* | *CNOT6L* | *PKP1* | *HOOK1* | *TNXB* |  |
| *AVPR1A* | *MAPK10* | *FAM65A* | *SERTAD4* | *CNR2* | *PKP3* | *HOPX* | *TOB1* |  |
| *B9D1* | *MARS* | *FAM65B* | *SF1* | *CNTFR* | *PLA2G2A* | *HOXC8* | *TOMM20* |  |
| *BACH2* | *MATK* | *FAM65C* | *SFMBT1* | *CNTN3* | *PLAC8* | *HOXC9* | *TOR3A* |  |
| *BAHCC1* | *MB* | *FAM69A* | *SFN* | *COBLL1* | *PLCD1* | *HP1BP3* | *TOX2* |  |
| *BANK1* | *MCM6* | *FAM73B* | *SFRP2* | *COCH* | *PLCG1* | *HRC* | *TP53INP1* |  |
| *BCAS4* | *MCOLN3* | *FAM92A1* | *SGCA* | *COL10A1* | *PLCL2* | *HSD11B1* | *TPD52* |  |
| *BCL11A* | *MDFI* | *FAM92B* | *SGCD* | *COL11A1* | *PLEKHH2* | *HSD11B2* | *TPM2* |  |
| *BCL11B* | *MDK* | *FAM96A* | *SGCE* | *COL14A1* | *PLN* | *HSD17B8* | *TPPP3* |  |
| *BCL9L* | *ME3* | *FBLIM1* | *SGIP1* | *COL19A1* | *PLP1* | *HSH2D* | *TPRG1* |  |
| *BCOR* | *MEF2B* | *FBLN1* | *SGK223* | *COL1A1* | *PLXDC1* | *HSPA12A* | *TRAPPC10* |  |
| *BEX5* | *MEF2C* | *FBXO17* | *SGSM3* | *COL1A2* | *PLXNA4* | *HSPB2* | *TRAPPC2* |  |
| *BGN* | *MEG3* | *FBXO18* | *SH2B2* | *COL3A1* | *PMEPA1* | *HSPB7* | *TRAT1* |  |
| *BHLHA15* | *MEG8* | *FBXO34* | *SH2D2A* | *COL4A3* | *PNOC* | *HTRA3* | *TRDMT1* |  |
| *BHLHE22* | *MEI1* | *FBXO44* | *SHOX2* | *COL4A4* | *PNRC1* | *HVCN1* | *TRIB1* |  |
| *BHMT2* | *MEIS2* | *FCER2* | *SIDT1* | *COL5A2* | *PNRC2* | *ICOS* | *TRIM29* |  |
| *BICC1* | *MEIS3* | *FCHO1* | *SIK1* | *COL6A1* | *POC5* | *IFFO2* | *TRIM52* |  |
| *BIK* | *METRN* | *FCHSD1* | *SIK3* | *COL6A2* | *PODN* | *IFI27L1* | *TRIM9* |  |
| *BLK* | *METTL12* | *FCHSD2* | *SIL1* | *COL6A3* | *PODNL1* | *IFITM2* | *TRO* |  |
| *BLNK* | *MFAP2* | *FCRL1* | *SIRPG* | *COL6A6* | *POLD4* | *IGF2* | *TRPC6* |  |
| *BMF* | *MFAP4* | *FCRL2* | *SIT1* | *COL7A1* | *POLR1D* | *IGFBP4* | *TRPV3* |  |
| *BMP6* | *MFAP5* | *FCRL3* | *SKIV2L* | *COL9A2* | *POLR2J3* | *IGFBP7* | *TSPAN11* |  |
| *BMPER* | *MFHAS1* | *FCRL5* | *SKP1* | *COL9A3* | *POLR3E* | *IGSF10* | *TSPAN32* |  |
| *BRD1* | *MGEA5* | *FCRL6* | *SLA2* | *COMP* | *POMP* | *IKBKE* | *TSPYL2* |  |
| *BRSK1* | *MIA* | *FCRLA* | *SLAMF1* | *COPE* | *POU2AF1* | *IKZF1* | *TTC13* |  |
| *BSCL2* | *MIAT* | *FEN1* | *SLAMF6* | *COPZ2* | *POU2F2* | *IKZF2* | *TTC16* |  |
| *BST1* | *MICB* | *FEZ1* | *SLAMF7* | *CORO2A* | *PPIB* | *IKZF3* | *TTC9* |  |
| *BTBD9* | *MIF* | *FGD2* | *SLC17A7* | *CORO2B* | *PPL* | *IL11RA* | *TTLL7* |  |
| *BTK* | *MIR155HG* | *FGF10* | *SLC17A9* | *COX4I2* | *PPP1R13B* | *IL12RB1* | *TTYH1* |  |
| *C10orf10* | *MIXL1* | *FGF7* | *SLC1A4* | *CPEB1* | *PPP1R14A* | *IL12RB2* | *TUB* |  |
| *C10orf54* | *MME* | *FGFBP2* | *SLC22A17* | *CPNE5* | *PPP1R16B* | *IL17D* | *TUBB2B* |  |
| *C11orf21* | *MMP10* | *FHL5* | *SLC22A3* | *CPNE7* | *PPP1R1B* | *IL18R1* | *TWIST1* |  |
| *C11orf24* | *MMP11* | *FIBIN* | *SLC25A27* | *CPXM1* | *PPP2R5C* | *IL18RAP* | *TWIST2* |  |
| *C11orf31* | *MMP12* | *FICD* | *SLC25A42* | *CPZ* | *PRDM6* | *IL2* | *TXK* |  |
| *C11orf53* | *MMP23B* | *FIGF* | *SLC26A5* | *CR2* | *PRDX4* | *IL21R* | *TXLNB* |  |
| *C11orf58* | *MOCS1* | *FKBP11* | *SLC2A10* | *CRABP1* | *PRELID1* | *IL23A* | *TXNDC5* |  |
| *C11orf80* | *MORF4L1* | *FMO3* | *SLC2A11* | *CREB3L2* | *PRELP* | *IL2RB* | *TYSND1* |  |
| *C14orf132* | *MPHOSPH9* | *FMOD* | *SLC35F2* | *CRELD2* | *PRF1* | *IL32* | *UBASH3A* |  |
| *C14orf159* | *MPP7* | *FN1* | *SLC38A1* | *CREM* | *PRICKLE2* | *IL34* | *UBC* |  |
| *C14orf169* | *MPZL3* | *FNDC4* | *SLC38A5* | *CRTAM* | *PRKCA* | *IL7R* | *UBE2C* |  |
| *C14orf28* | *MRGPRF* | *FOXF2* | *SLC7A1* | *CSNK1G2* | *PRKCDBP* | *INMT* | *UBE2D2* |  |
| *C15orf57* | *MRPL1* | *FOXP3* | *SLC7A2* | *CSPG4* | *PRKCQ* | *IPCEF1* | *UBE2D3* |  |
| *C16orf74* | *MRPS24* | *FOXS1* | *SLCO1C1* | *CSRNP3* | *PRKG1* | *IQCG* | *UBXN1* |  |
| *C16orf89* | *MRVI1* | *FRAT1* | *SLFN12L* | *CTAGE5* | *PRKX* | *IQGAP2* | *UGT8* |  |
| *C17orf62* | *MS4A1* | *FRZB* | *SLIT2* | *CTGF* | *PRR16* | *IRF4* | *UQCRHL* |  |
| *C19orf66* | *MXRA5* | *FST* | *SLIT3* | *CTH* | *PRR5L* | *IRF6* | *USP20* |  |
| *C1orf186* | *MXRA8* | *FSTL3* | *SMAD7* | *CTLA4* | *PRR7* | *IRF8* | *USP36* |  |
| *C1orf228* | *MYBL1* | *FTH1* | *SMOC2* | *CTSK* | *PRRX1* | *ISCU* | *UXT* |  |
| *C1orf95* | *MYH11* | *FTL* | *SMPDL3B* | *CXCL12* | *PRRX2* | *ISLR* | *VAPA* |  |
| *C1QTNF2* | *MYL9* | *FXYD3* | *SNAI3* | *CXCL13* | *PRSS8* | *ISM1* | *VAV3* |  |
| *C1QTNF6* | *MYOC* | *FXYD5* | *SNHG8* | *CXCL17* | *PSAT1* | *ISYNA1* | *VCP* |  |
| *C1S* | *NAPSA* | *FYB* | *SNRPB* | *CXCL6* | *PSD* | *ITGA4* | *VDAC2* |  |
| *C21orf2* | *NBPF15* | *FYN* | *SNX20* | *CXCR5* | *PTCH2* | *ITGA7* | *VGLL1* |  |
| *C2orf40* | *NCCRP1* | *GAB1* | *SNX22* | *CXCR6* | *PTGDS* | *ITGA8* | *VGLL3* |  |
| *C2orf88* | *NCF1* | *GABRP* | *SNX25* | *CXorf21* | *PTGER4* | *ITIH5* | *VILL* |  |
| *C5orf46* | *NCF4* | *GADD45A* | *SOD3* | *CXXC5* | *PTGES* | *ITK* | *VIT* |  |

**Supplementary Table S13.** Performance evaluation of the DigNet model across various parameter settings.

| **Module** | **# of principal components** | **No PCA** | **10** | **20** | **30** | **40** |
| --- | --- | --- | --- | --- | --- | --- |
| PCA | AUROC | 0.8378±0.0034 | 0.8356±0.0036 | 0.8434±0.0032 | **0.8442±0.0033** | 0.8436±0.0036 |
| AUPRC | 0.5990±0.0345 | 0.60311±0.038 | 0.6039±0.0374 | **0.6064±0.0358** | 0.6031±0.0384 |
| F1-score | 0.6321±0.0216 | 0.6291±0.0243 | 0.6648±0.0251 | **0.6490±0.0238** | 0.6491±0.0243 |
|  | **# of sub-learners** | **No Ensemble** | **10** | **30** | **50** | **100** |
| Ensemble | AUROC | 0.6730±0.0035 | 0.8307±0.0036 | **0.8442±0.0034** | 0.8436±0.0030 | 0.8446±0.0030 |
| AUPRC | 0.6052±0.0190 | 0.5922±0.0339 | **0.6064±0.0358** | 0.6005±0.0352 | 0.6025±0.0354 |
| F1-score | 0.5358±0.0178 | 0.6399±0.0196 | **0.6490±0.0238** | 0.6491±0.0212 | 0.6574±0.0211 |
|  | **# of neurons** | **64** | **128** | **256** | **512** |  |
| Hidden layer (MLP) | AUC | 0.8426±0.0031 | **0.8442±0.0034** | 0.8414±0.0038 | 0.8418±0.0034 |  |
| AUPR | 0.5982±0.0342 | **0.6064±0.0358** | 0.6025±0.0383 | 0.5982±0.0354 |  |
| F1-score | 0.6599±0.0240 | **0.6490±0.0238** | 0.6509±0.0219 | 0.6485±0.0228 |  |
|  | **# of neurons** | **64** | **128** | **256** | **512** |  |
| Hidden layer (Transformer) | AUROC | **0.8442±0.0033** | 0.8441±0.0040 | 0.8437±0.0039 | 0.8359±0.0031 |  |
| AUPRC | **0.6064±0.0358** | 0.6080±0.0417 | 0.6014±0.0381 | 0.5940±0.0342 |  |
| F1-score | **0.6490±0.0238** | 0.6449±0.0211 | 0.6494±0.0224 | 0.6453±0.0226 |  |
|  | **# of head** | **2** | **4** | **8** | **16** |  |
| Multi-head | AUROC | 0.8429±0.0034 | **0.8442±0.0034** | 0.8412±0.0041 | 0.8414±0.0035 |  |
| AUPRC | 0.6015±0.03636 | **0.6064±0.0358** | 0.5982±0.0258 | 0.5983±0.0386 |  |
| F1-score | 0.6452±0.0222 | **0.6490±0.0238** | 0.6395±0.0200 | 0.6381±0.0211 |  |
|  | **# of layer** | **2** | **4** | **6** | **8** | **10** |
| Transformer layer | AUROC | **0.8442±0.0034** | 0.8154±0.0038 | 0.8014±0.0042 | 0.8142±0.0034 | 0.7569±0.0057 |
| AUPRC | **0.6064±0.0358** | 0.5689±0.0298 | 0.5579±0.0364 | 0.5682±0.0353 | 0.6104±0.0266 |
| F1-score | **0.6491±0.0238** | 0.6638±0.0231 | 0.6538±0.0228 | 0.6637±0.0224 | 0.6336±0.0246 |

| **Algorithm 1** iMetacell: Constructing iMetacells from gene expression profiles |
| --- |
| **Input**: (gene expression profile matrix with genes and cells), (the desired number of iMetacells) |
| **Initialization**:  (Store the indices of selected iMetacells)  (Correspond to S, the maximum union lengths with neighbors in )  (Set the neighbor parameter for KNN, or user-defined)  (Maximum number of iterations) |
| **Run**:   1. Calculate the KNN set of cell ; 2. While < : 3. Randomly select a cell from that does not belong to ; 4. Calculate ; 5. for in : 6. Calculate ; 7. if is greater than any value in :   Replace the minimum value in with ;  Replace the corresponding position in with the index of ;  if is not updated:    else:     1. End |
| **Output**: |
